Title - Negative effects of agricultural intensification on energetic gain rates of a declining aerial insectivore

List of Authors - Daniel R. Garrett<sup>1,2</sup>, Fanie Pelletier<sup>1</sup>, Dany Garant<sup>1</sup>, and Marc Bélisle<sup>1</sup>

<sup>1</sup>Département de biologie, Université de Sherbrooke, 2500 Boulevard de l'Université, Sherbrooke, Québec J1K2R1 Canada

<sup>2</sup>[daniel.garrett@usherbrooke.ca](mailto:daniel.garrett@usherbrooke.ca)

## 1 **Abstract**

2 The historical rise of intensive agricultural practices is hypothesized to be related to declines of  
3 grassland and aerial insectivorous birds. Drivers of declines may also influence the overall  
4 abundance and spatial distribution of insects within agricultural landscapes. Subsequently,  
5 average energetic gain rates of birds breeding within more agro-intensive landscapes may be  
6 impacted. Lower energetic gain rates in agro-intensive landscapes may lead to reduced growth  
7 rate, body condition or fledging success of nestlings but also to diminished body condition of  
8 food provisioning adults. In this study, we assessed if energetic gain of nestlings and food  
9 provisioning behavior of adults varied across a gradient of agricultural intensification in a  
10 declining aerial insectivore, the Tree swallow (*Tachycineta bicolor*). We found that hourly gain  
11 rate was lower in agro-intensive landscapes, and yet travel distances were longest within less  
12 agro-intensive landscapes. Our results highlight that, in order to maximize long term average  
13 gain rates, Tree swallows breeding within agro-intensive landscapes must forage with greater  
14 intensity, perhaps at a cost to themselves, or else costs will transfer to growing broods. Our work  
15 provides further evidence that agricultural intensification on the breeding grounds can contribute  
16 to the declines of aerial insectivores in part through a trophic pathway.

17

18 Key words: aerial insectivores; agricultural intensification; breeding costs; central-place  
19 foraging; Diptera; marginal value theorem; PinPoint GPS; resource availability; *Tachycineta*  
20 *bicolor*; Tree swallows.

## 21 **Introduction**

22 Populations of both grassland and farmland birds have severely declined since the 1970s  
23 (Stanton et al. 2018, Rosenberg et al. 2019, Bowler et al. 2019). These groups include many  
24 aerial insectivores, a foraging guild presenting steeper population declines than most other avian  
25 guilds (Nebel et al. 2010, Michel et al. 2016). Concurrent changes in landscape composition and  
26 avian population indices have led to the hypothesis that these declines are driven, at least partly,  
27 by the increasing use of intensive agricultural practices (Benton et al. 2003, Hallmann et al.  
28 2014, Stanton et al. 2018, Spiller and Dettmers 2019). Indeed, intensive agricultural practices  
29 increasing agricultural yield per unit area of cultivated land, such as row cropping and the use of  
30 both synthetic fertilizers and pesticides, have risen dramatically in the past decades (Tschamtko  
31 et al. 2005, DiBartolomeis et al. 2019, Malaj et al. 2020).

32 Although many aerial insectivores share a common foraging strategy and diet, the ecological  
33 diversity of this guild invalidates many of the hypothesized drivers of farmland bird declines  
34 (Stanton et al. 2018, Spiller and Dettmers 2019). For instance, increased mechanization,  
35 including the frequency of forage harvesting, results in the significant nest destruction of ground  
36 nesting farmland birds (Tews et al. 2013, Stanton et al. 2018). Yet, most aerial insectivores do  
37 not nest on the ground and thus many hypothesized mechanisms underlying their declines  
38 involve a trophic pathway. One of those mechanisms postulates that intensive agricultural  
39 practices have reduced the overall abundance and changed the species composition or nutritive  
40 value of their prey (Stanton et al. 2018, Twining et al. 2018, Spiller and Dettmers 2019). Many  
41 factors of agricultural intensification can indeed affect the abundance, species assemblages,  
42 distributions, and trophic interactions of insects (Raven and Wagner 2021, Wagner et al. 2021).

43 Therefore, intensive agricultural practices have the potential to affect the fitness of insectivorous  
44 birds through food limitation.

45 Previous studies have indeed observed that agricultural intensification, including habitats  
46 impactful to insect communities and abundances, correlate with changes in dietary composition  
47 (Nocera et al. 2012, English et al. 2017, Bellavance et al. 2018), reductions in annual fitness  
48 proxies (Benton et al. 2002, Ghilain and Bélisle 2008, Garrett et al. 2021), and altered population  
49 growth (Stanton et al. 2018) of several aerial insectivore species. Studies linking prey availability  
50 to aerial insectivore breeding success have, however, often failed to observe such relationships  
51 (Dawson and Bortolotti 2000, Dunn et al. 2011, Imlay et al. 2017, McClenaghan et al. 2019). A  
52 lack of association between food availability and fitness proxies is potentially explained by  
53 breeding individuals compensating for reduced food availability or quality by altering foraging  
54 effort (Stephens et al. 2008). For altricial birds, food-provisioning is considered one of the most  
55 costly behaviors as individuals must meet the increasing metabolic demands of their brood while  
56 foraging for themselves (Drent and Daan 1980, Wiersma 2005, Schifferli et al. 2014). Moreover,  
57 aerial insectivores are mostly short-lived species and thus life history theory suggests  
58 impediments to breeding will have significant impacts on lifetime reproductive success (Stearns  
59 1992, Sæther and Bakke 2000, Berzins et al. 2020). Therefore, if compensation of reduced prey  
60 availability is through increased foraging effort, then it potentially comes at a cost to an  
61 individual's own survival and future reproduction (Stearns 1992, Reznick et al. 2000, Harrison et  
62 al. 2011).

63 The large-scale homogenization of landscapes resulting from agricultural intensification (Benton  
64 et al. 2003) may thus alter foraging behavior and exacerbate the stress experienced by food-

65 provisioning adults (Hinsley 2000). Assuming food-provisioning birds are maximizing their  
66 average long-term rate of energy gain (Charnov 1976, Stephens et al. 2008), and if food patches  
67 are indeed of lower quality and/or more sparsely distributed within intensively cultivated  
68 landscapes, then central-place foraging theory predicts lower gain and nest visitation rates within  
69 these landscapes (Orians and Pearson 1979, Olsson et al. 2008). Therefore, parents may optimize  
70 foraging strategies, potentially by increasing foraging efforts, to compensate for lowered gain  
71 rates and to overcome the consequences of nesting within such agro-intensive landscapes  
72 (Olsson et al. 2008). Empirical evidence for such elevated foraging workloads includes foraging  
73 at greater distances, lower nest visitation rates, and reduced nest attendance in landscapes  
74 dominated by agriculture (Bruun and Smith 2003, Poulin et al. 2010, Catry et al. 2014, Stanton et  
75 al. 2016, Staggenborg et al. 2017, Evens et al. 2018). Furthermore, birds whose central places are  
76 located within more intensely cultivated landscapes present several conditions potentially related  
77 to increased foraging costs (Evens et al. 2018), including greater oxidative stress (Stanton et al.  
78 2017, Evens et al. 2018) and lower immunocompetency (Belant et al. 2000, Pigeon et al. 2013).  
79 It is therefore imperative to assess the influence of landscape context on the capacity of breeding  
80 individuals to compensate for poor foraging conditions and the resultant workload.

81 A recent 11-year study observed that, upon controlling for local prey availability, several indices  
82 of breeding success in Tree swallow (*Tachycineta bicolor*) remained associated with an  
83 agricultural gradient in southern Québec, Canada (Garrett et al. 2021). Breeding attempts within  
84 landscapes dominated by intensively managed row crops resulted in reduced fledging success,  
85 longer nestling periods and shorter fledging wing lengths (Garrett et al. 2021). If agro-intensive  
86 habitats do indeed reduce the functional connectivity of landscapes by reducing the amount and  
87 distribution of suitable foraging patches, then central-place foragers in these landscapes

88 potentially expend more time or energy traveling between food patches and exploiting them,  
89 with the additional cost of settling for patches of lower quality (Hinsley 2000, Bélisle 2005,  
90 Evens et al. 2018). Therefore, one hypothesized mechanism explaining the results of Garrett et  
91 al. (2021) is that swallows breeding in agro-intensive landscapes provide food at lower rates and  
92 thus nestlings experience lower energetic gain rates.

93 Presented here are the results of a study evaluating the strength of evidence for this hypothesis.  
94 Our principal goals were to evaluate how a gradient of agricultural intensification influenced the  
95 provisioning rate by adults, the energetic gain rates of nestlings, and travel distances of food  
96 provisioning parents. Specifically, we evaluated a series of hypotheses grounded in central-place  
97 foraging theory (Stephens et al. 2008, Olsson et al. 2008). We firstly assumed the duration of  
98 each foraging bout is composed of the travel to, between, and within foraging patches, and that  
99 the biomass of food collected while exploiting a patch increases, yet at a decreasing rate with  
100 patch residency time (Olsson et al. 2008). We further assumed food bolus biomass is positively  
101 related to its energy content, that traveling and foraging costs increase linearly with time, and  
102 that nestling rearing females are attempting to maximize their average long-term net rate of  
103 energy gains per unit time (Charnov 1976, Stephens et al. 2008). Therefore, females whose nests  
104 are within landscapes composed of more dispersed or poorer foraging patches, as expected in  
105 landscapes dominated by agro-intensive cultures, will experience longer travel times (Figure 1A  
106 and C) or lower instantaneous gain rates while exploiting patches (Figure 1B and C) and thereby  
107 show lower food delivery rates. Finally, shorter travel times can counterbalance slower gain rates  
108 within food patches, resulting in different food provisioning rates and yet similar energetic gain  
109 rates between contrasting landscapes (Figure 1D). In addition, we tested the prediction that  
110 foraging distances would be furthest within more agro-intensive landscapes, indicating greater

111 travel time and costs in such landscapes. We also tested the expectation that these effects would  
112 be at least partly alleviated with increasing local prey availability (i.e. prey availability close to  
113 the nest), but exacerbated by increasing food-demand from the brood (e.g. larger and older  
114 broods; Geary et al. 2020).

## 115 **Methods**

### 116 Study sites and nest box visits

117 Data were collected between 2011 and 2016 within a nest box system placed across 40 farms  
118 throughout a gradient of agricultural intensification in southern Québec, Canada (Figure 2, but  
119 see Ghilain and Bélisle 2008 for details). The western portion of the study area is composed  
120 primarily of large-scale row cropping, resulting in expanses denuded of forest cover and  
121 dominated by corn and soybean monocultures, and to a lesser extent, other cereals (principally  
122 wheat) (Bélanger and Grenier 2002, Ruiz and Domon 2009). This focus on monocultures has led  
123 to the near ubiquitous use of fertilizers, herbicides, insecticides and fungicides, as well as  
124 increased mechanization and removal of both surface waters and wetlands in this region (Jobin et  
125 al. 1996). These agro-intensive landscapes transition to ones composed primarily of pastures and  
126 forage crops (e.g. hay, alfalfa and clover) in the eastern parts of the study system and are  
127 interspersed within large areas of forest cover and a systematic drop in pesticide detections  
128 (Sigouin 2020).

129 Ten nest boxes were placed on the field margins of each farm (total N=400) and have been  
130 monitored every two days throughout each Tree swallow breeding season since 2006 (Porlier et  
131 al. 2009). The number of eggs and nestlings were counted during each nest box visit, and thus  
132 the age and phenology of each brood is known within two days of accuracy. We captured > 99%

133 of adult females (during incubation) and 80% of males (during the brooding period) of each  
134 breeding attempt. Adults were banded with an aluminum US Geological Survey band containing  
135 a unique identification code and a series of morpho-metrics and samples were collected (Ghilain  
136 and Bélisle 2008, Lessard et al. 2014).

### 137 Food provisioning

138 Food provisioning was characterized via two rates defining hourly energetic gains of growing  
139 broods: the total biomass of delivered food boluses per hour (bolus biomass; mg/hr) and the  
140 number of food boluses delivered per hour (bolus delivery). These rates were estimated during  
141 food-provisioning sessions conducted between 2011 and 2016. Sessions consisted of two  
142 consecutive 30-min blocks in which collars were applied to each nestling within broods aged 6,  
143 8, 10, and 12 days old (Bellavance et al. 2018). Collars were composed of a rubber band slid  
144 through a 5-mm long feeding tube and adjusted like a bolo-tie to capture food boluses in the crop  
145 yet loose enough to not restrict respiration. This method has often been used to document the  
146 diet of Tree swallows, and has not been found to impact nestling survival (McCarty and Winkler  
147 1999, Johnson and Lombardo 2000, Smits et al. 2005, Bellavance et al. 2018). At the end of each  
148 block, boluses were carefully removed via forceps and the nest was checked for discarded  
149 boluses. Boluses were then placed in sterile 50-ml conical tubes and immediately placed in a  
150 portable freezer (< 12 hours) until being stored at -80°C. At the end of each session, collars were  
151 removed and the starting time, the Julian date and the presence of precipitation was recorded.  
152 The maximum temperature during sessions was also noted at the end of each breeding season via  
153 iButtons (model DS1922L; Embedded Data Systems, Lawrenceburg, Kentucky, USA) attached  
154 to the underside of a single nest box on each farm that recorded hourly temperatures.



155 In a tandem study occurring between 2013 and 2016, the food boluses collected during food  
156 provisioning sessions were analyzed for the presence of the principal active agents of many  
157 pesticides (Haroune et al. 2015). The methods of this study required recording the wet mass of  
158 food boluses ( $\pm 1$  mg). We subsequently used this measure to estimate the total biomass of food  
159 boluses delivered during the one-hour food provisioning sessions.

## 160 Foraging distance

161 We used GPS locations of nestling rearing females (nestling age 4-12 days) to estimate their total  
162 hourly distance traveled (DT) and mean hourly distance from their nest box (DNB). These  
163 metrics were assumed to be indicative of the amount of travel undergone by each individual and  
164 therefore to reflect the amount of energy expended while food provisioning. We used hourly  
165 travel distances to have a comparable time scale to the hourly rates estimated by the food-  
166 provisioning sessions. Specifically, we fitted PinPoint-10 GPS tags (Lotek Wireless Inc,  
167 Newmarket, Ontario, Canada) to 43 nestling rearing females across 14 farms in 2019 (Figure 2,  
168 white points). Chosen farms represented landscapes dominated by either forage and pasture  
169 fields or the principal row-crop monocultures of our study system (i.e. corn, soybean and other  
170 cereals), with minimal tree cover. Tags weighed between 0.9 g and 1.2 g, including the harness  
171 (Figure S1), and were fitted over the synsacrum using leg loops (Rappole and Tipton 1991). We  
172 preprogrammed tags so GPS fixes (“SWIFT” fixes, nominal horizontal accuracy  $\pm 10$  m) were  
173 taken every 15 min between 5:00 and 20:00 local time (N = 60 locations) the day after  
174 deployment, allowing for a habituation period. This schedule was the most intensive that we  
175 could use to cover the majority of the daily food provisioning period given the battery-life  
176 (McCarty 2002, Rose 2009). The day after data collection, individuals were caught, and their tag  
177 removed. Once data were extracted, movements of each individual were derived by connecting

178 GPS locations, in chronological order, and then calculating the distance along each segment of  
179 the resulting path using both the *sp* (Bivand et al. 2013) and *rgeos* (Bivand and Rundel 2019)  
180 packages in the R interface (R Core Team 2019). We estimated DT by summing the length of  
181 each segment within each one-hour sampling period. We then estimated DNB by grouping points  
182 within each one-hour block and then calculating the mean distance between each point and the  
183 female's nest box.

#### 184 Landscape characterization

185 Landscape characterization started with delineating habitats, including agricultural parcels,  
186 within 500 m of each nest box using orthophotos (scale 1:40 000) in QGIS (QGIS 2020) at the  
187 end of each breeding season between 2011 to 2019. This spatial scale hosts close to 80% of  
188 nestling rearing females' daily time budget. We then characterized each habitat parcel in situ,  
189 defining agricultural habitats by the cultures grown. We then reclassified habitats into one of  
190 four higher order categories represented by forest, corn and soybean, forage fields (including  
191 pastures as well as hay, alfalfa, and clover fields), and cereals (e.g. wheat, oat, barley). Higher  
192 order categories represent the hypothesized habitats Tree swallows use as indicators during nest-  
193 site selection, and the principal habitats composing landscapes throughout this system (Rendell  
194 and Robertson 1990, Courtois 2020, Winkler et al. 2020).

195 We calculated the mean percent cover of each higher order category across all nest boxes on  
196 each farm for each breeding season, resulting in 240 separate landscape contexts (i.e., 40 farms x  
197 6 years). To obtain an integrative measure of the percent cover of all higher order habitats,  
198 defined as the landscape context, we used a robust principal components analysis (PCA) for  
199 compositional data (Filzmoser et al. 2009) to assign "site scores" to each of the farms during  
200 each year. Site scores were defined by the values along the first two components of the resulting

201 compositional PCA as fitted using the robCompositions package in R (Templ et al. 2011). The  
202 first component (Comp.1) explained 79.8% of the variance in landscape context and was  
203 correlated positively with corn and soybean cultures and negatively with both forest cover and  
204 forage fields (Figure 3A). The second component (Comp.2) explained 16.3% of the variance and  
205 was positively correlated with forest cover, negatively with both forage and cereal covers. Site  
206 scores were assigned to each food-provisioning session throughout the study.

207 The study of foraging distance occurred separately and on a subset of farms than those used to  
208 estimate food provisioning (Figure 2). We thus repeated the landscape characterization used in  
209 the food-provisioning study, yet for the subset of farms hosting the foraging distance study. The  
210 resulting PCA was similar to that of the food provisioning sessions. The first component  
211 explained 87.4% of the variance in landscape context and correlated positively with both corn  
212 and soybean cultures, and negatively with both forest and forage cover (Figure 3B). The second  
213 component explained 12.1% of the variance and correlated positively with forest cover as well as  
214 with both corn and soybean cultures, and negatively with forage and cereal cultures.

215 For ease of interpretation, all statistical predictions and interpretations were made in reference to  
216 five landscape context scenarios. These scenarios represent the predominant types of landscape  
217 contexts experienced across the agricultural gradient and are defined by the site scores of five  
218 farms (1-5) identified in Figure 3A and B. The scenarios for the food-provisioning sessions are:  
219 (1) ones dominated by corn or soybean with 8.8% forest cover (corn/soybean with forest); (2)  
220 ones denuded of forest cover and dominated by only corn or soybean (corn/soybean); (3) ones  
221 denuded of forest cover and dominated by a mixture of corn, soybean and cereals (mixed row  
222 crops); (4) ones with 9.0% forest cover and dominated by forage crops (forage); and (5)  
223 landscapes with 69.0% forest cover and few cultivated parcels typically devoted to forage crops

224 (agro-forested). Although site score values differ between the PCA derived for the food-  
225 provisioning and foraging distance studies, they are qualitatively similar and the above landscape  
226 context scenarios apply to both.

227 The distance of GPS locations from their respective nest boxes, greater than 0.5 km from nest  
228 boxes (19.3% of locations), was positively related to the percent cover of water bodies (e.g.  
229 rivers, wetlands and ponds) around a point (Figure S2), supporting the contention that these  
230 features are important (Elgin et al. 2020, Berzins et al. 2020). These habitats are however rare  
231 within our system and were considered as potential confounding factors of the observed foraging  
232 responses. Moreover, we hypothesized that the influence of water features located far from a nest  
233 may depend on their local availability (i.e. close to the nest). We therefore undertook a modeling  
234 endeavor aimed at identifying the spatial extent and the type of water features most influential to  
235 the rate of food provisioning (Appendix S1, Figure S3).

236 Due to several model convergence problems, we found numerical stability was greatest when  
237 treating water features as the non-overlapping cover of wetlands and open bodies of water  
238 (hitherto referred to as surface water). A local minimum of delta AICc was observed when  
239 including the percent cover of surface water calculated within 1 km (local percent cover) and  
240 10 km (regional percent cover) from the nest. These model terms were included in all models for  
241 all foraging proxy. Surface water data were derived from vector layers acquired from the  
242 Canadian National Hydro Network data sets (NHN 2020) and Ducks unlimited (Ducks  
243 Unlimited, 2020). All calculations of percent cover were made using the sf (Pebesma 2018) R  
244 package.

## 245 Local prey availability

246 Local prey availability was represented by the dry biomass of Diptera found within insect  
247 samples from two separate insect traps placed on each of the 40 farms between 2006 and 2016.  
248 We focused on dry biomass of Diptera (using the number of Diptera provides qualitatively  
249 similar results, analyses not shown, see also Rioux Paquette et al. 2013, Garrett et al 2021)  
250 because they represent a majority of the insects found in the diets of nestling Tree swallows  
251 (McCarty and Winkler 1999, Johnson and Lombardo 2000, Mengelkoch et al. 2004, Twining et  
252 al. 2018). Within our study system, 67% of the insects found in food boluses delivered to  
253 nestlings are Diptera (Rioux Paquette et al. 2013, Bellavance et al. 2018). The focus of this work  
254 being on the availability of food during the nestling period, we processed insect samples  
255 collected between 1 June and 15 July, representing the nestling period of over 96% of first  
256 breeding attempts. Diptera within each insect sample were removed, counted, and then placed in  
257 an oven at 50°C for over 24 hours to ensure no further changes in mass. Sample dry mass was  
258 then recorded ( $\pm 0.0001$  g) without delay.

259 To obtain prey estimates more reflective of the farm vs. local scale of each trap, and avoid  
260 punctuated events as insect swarms, we chose to use daily model predictions of Diptera biomass  
261 from generalized additive models (GAMs) in which raw values were regressed against the Julian  
262 date of sample collection for each farm and year. GAMs were fitted as a tensor product smoother  
263 using the `mgcv` package in R (Wood 2017) with an identical degree of smoothness ( $k=10$ ).  
264 Model predictions are the accumulated biomass of Diptera over a roughly 48-hour period  
265 occurring over a 3-day window (i.e. from the time the trap was reset on day one, the entirety of  
266 day 2, and until the content of the trap was collected on day 3). As we wanted estimates of

267 Diptera biomass on the day of the food provisioning session, prey availability is represented by  
268 the predicted Diptera biomass on the day following the food provisioning session.

## 269 Statistical methods

### 270 *Food provisioning*

271 Bolus biomass was a continuous right-skewed (conditional) response containing zeros and was  
272 consequently modeled with GLMMs using a tweedie distribution and a log link function (Lo and  
273 Andrews 2015). It was noted that the likelihood to encounter food provisioning sessions with  
274 zero delivered boluses varied with year, thus bolus delivery followed a (conditional) zero-  
275 inflated Poisson distribution, including a year-varying zero-inflation factor, and was modeled  
276 with generalized linear mixed effect models (GLMMs) with a log link (Blasco & Moreno et al.  
277 2019). In order to account for differences in sampling effort (both 30-min blocks were completed  
278 in 86% of sessions), we included whether sessions lasted half or an entire hour as an offset (i.e.  
279  $\log(0.5)$  or  $\log(1)$ , respectively) in both sets of analyses. We further included year, farm, and  
280 brood IDs as random factors in order to account for the data's hierarchical structure (i.e. broods  
281 nested within farms nested within years).

282 We took an information theoretic and multimodel approach to evaluate links between landscape  
283 context and rates of food provisioning by comparing a set of 12 models representing biologically  
284 relevant alternative hypotheses (Table 1 and Table S1). Except for a Null model containing only  
285 random effects, we started with a Base model including potential confounding variables. This  
286 model contained two weather variables. First, the mean maximum temperature, as insects require  
287 a threshold temperature before being active (Taylor 1963, Gruebler et al. 2008), and the upper  
288 limit of foraging swallow behavior is potentially thermally constrained (Tapper et al. 2020).

289 Second, the presence of precipitation, as we expected precipitation to act as a hindrance to  
290 foraging (Cox et al. 2019), and because food provisioning sessions did not last long enough to  
291 estimate amount of precipitation. The base model also included the age of the female (second  
292 year (SY) or after second year (ASY); Hussell 1983), time at the start of the provisioning session  
293 as a second-order polynomial, the percent cover of surface water within 1 km and 10 km and  
294 their interaction (Elgin et al. 2020), and a proxy of the brood's food demand (Geary et al. 2020).  
295 This brood demand proxy was represented by the multiplication of the brood size with the brood  
296 age. We did not expect foraging rates to respond linearly with this proxy, as the functional  
297 response likely reaches a plateau whereby food provisioning parents can no longer increase their  
298 efforts. We therefore treated this variable as a third-order polynomial. All model terms within  
299 Base were included in all subsequent models of the candidate set. Our principal model of interest  
300 was one in which sites scores and their interaction were added to assess landscape context effects  
301 (Base + Land). Because potential negative effects of foraging within agro-intensive landscapes  
302 may be alleviated with increasing prey availability closer to nests, we also considered models  
303 with only local prey availability (Base + Food), one with both prey availability and site scores  
304 (Base + Food + Land), and one also including the interaction between prey availability and  
305 Comp.1 (Base + Food\*Land). We further hypothesized provisioning rates may be influenced by  
306 brood demand and the availability of prime foraging habitat and included four models with such  
307 relationships. These included one in which the effect of land cover and local prey availability  
308 varied with the demand proxy (Base + Food + Land \* Demand and Base + Land + Food \*  
309 Demand) or the local (1 km) percent cover of surface water (Base + Land + Food \* LSW and  
310 Base + Food + Land \* LSW).

311 *Foraging distance*

312 The two response variables characterizing the foraging distances of females were the total hourly  
313 distance traveled (DT) and the mean hourly distance an individual was from its nest box (DNB).  
314 These response variables were modeled using linear mixed effects models (LMM). Both  
315 response variables were log-transformed to ensure normality of residuals. We included the  
316 individual and farm IDs as random effects to account for the hierarchical structure of the dataset  
317 (i.e. locations nested within individuals nested within farms).

318 We applied an information theoretic and multimodel approach to a set of six models to evaluate  
319 hypotheses about foraging distances (Table 1 and Table S1). We started with a Null model only  
320 including random effects and a Base model including potential confounding variables influential  
321 to foraging distances (McCarty 2002, Dreelin et al. 2018, Elgin et al. 2020). Confounding factors  
322 included the brood demand proxy as a third-order polynomial, as well as the percent cover of  
323 surface water within 1 km and 10 km and their interaction. We further included proxies of local  
324 prey availability, including the Julian date and the maximum observed temperature during each  
325 one-hour sampling period as a second-order polynomial (Rioux Paquette et al. 2013, Bellavance  
326 et al. 2018, Garrett et al. 2021). Though the principal model of interests was one including site  
327 scores and their interaction (Base + Land), we compared another three models hypothesizing that  
328 the effects of foraging within agro-intensive landscapes may either be alleviated or exacerbated  
329 by confounding variables. We thus considered models also including an interaction term between  
330 Comp.1 and each potential confounder, namely brood demand (Base + Land\*Demand), local  
331 (1 km) percent cover of surface water (Base + Land\*LSW), and local prey availability (Base +  
332 Land\*Food).



333 In all analyses, the effects of key individual variables, including interactions, were estimated via  
334 multi-model inference whereby predictions were calculated by model-averaging with shrinkage  
335 and shown with their 95% unconditional confidence intervals (Burnham and Anderson 2002).  
336 All quantitative covariates were z-transformed and all analyses were performed in R version  
337 3.6.2 (R Core Team 2019) using the glmmTMB (Brooks et al. 2017) and AICcmodavg  
338 (Mazerolle 2020) packages. Model validation was performed following Zuur et al. (2009) using  
339 the DHARMA package (Hartig 2020)

## 340 **Results**

### 341 Food provisioning

#### 342 *Bolus biomass*

343 We measured the total bolus biomass delivered during 741 food provisioning sessions from 420  
344 broods, 92% of which consisted of both 30-min blocks. Overall mean bolus biomass was  
345 284.5 mg per hour (SD = 344.9), ranging from 208.2 mg to 319.2 mg across years (Figure S4).  
346 The Null and Base models were not supported by the data, contrary to models including  
347 information on landscape context (Table S1). Compared to forage landscapes (#4 in Figure 4B),  
348 bolus biomass was 54.0% lower within agro-forested landscapes (#5), 42.8% lower in mixed  
349 row-crop landscapes (#3), and 32.8% lower within corn/soybean landscapes (#2). Unlike for  
350 bolus delivery rate (see below), we did not find that the effect of corn/soybean cover was  
351 dependent upon forest cover (#1). We further found bolus biomass increased almost linearly with  
352 brood demand (Table 2 and Figure S5), and negatively correlated with the local percent cover of  
353 surface water and was greater for ASY females (Table 2, Figure S5 and Figure S6). Lastly, bolus

354 biomass increased with both the start time and the maximum temperature of the food  
355 provisioning session, until plateauing at 14:12 and 25°C, respectively (Figure S5).

### 356 *Bolus delivery*

357 We conducted 1,208 food provisioning sessions from 662 different broods. Overall mean bolus  
358 delivery was 2.00 boluses per hour (SD = 2.05), ranging from 1.69 to 2.25 across years (Figure  
359 S4). While the Null and Base models were not supported by the data, several alternative models  
360 received support (Table S1). We observed substantial landscape effects (Table 2, Figure 4A).  
361 Compared to forage landscapes (#4 in Figure 4A), bolus delivery rate was 39.6% lower within  
362 agro-forested landscapes (#5), 26.9% lower in mixed row-crop landscapes (#3), and 13.8% lower  
363 within corn/soybean landscapes (#2). The effect of corn/soybean cover was however highly  
364 dependent upon forest cover as the presence of remnant woodlots in landscapes highly  
365 dominated by these crops (#1) was associated with a bolus delivery rate 7.8% lower than within  
366 forage landscapes (#4). Although an increase of 18.4% in the mean bolus delivery rate was  
367 predicted across the full range of local prey availability, the effect size of this variable lacked  
368 precision (Table 2). We further found that bolus delivery rate was positively associated with  
369 brood demand (third-order) and both the start time and the maximum temperature of the food  
370 provisioning session, until plateauing at 14:23 and 25°C, respectively (Figure S7). It also  
371 negatively correlated with the local percent cover of surface water (Figure S8).

### 372 Foraging distance

373 We successfully deployed and recovered 43 GPS tags. Of these tags, 40 successfully recorded all  
374 60 attempted locations, resulting in 2,363 swift-fixes and 592 hourly estimates of foraging  
375 distances (Figure S9). The overall mean distance of each location from an individual's nest box

376 was 362 m (SD = 781) and 440 m (SD = 768) between each consecutive fix. Six females  
377 recorded locations over 5 km from their nest box with a maximum distance of 9.557 km.

378 *Hourly distance traveled*

379 Overall mean DT was 1,841 m (SD=2,301, Figure S4). A single most predictive and  
380 parsimonious model occurred when considering landscape context along with an interaction  
381 between Comp.1 and local percent cover of surface water (Table 2 and Table S1). DT was  
382 longest within agro-forested landscapes (#5 in Figure 4C) and was 60.1% further when compared  
383 to forage landscapes (#4). Compared to forage landscapes, distances were 13.6% shorter within  
384 mixed row-crop landscapes (#3), and yet 49.4% shorter within corn/soybean landscapes (#2).  
385 The effect of corn/soybean cover was however highly dependent upon forest cover, as the  
386 presence of remnant woodlots in landscapes highly dominated by these crops (#1) was associated  
387 with a DT 27.0% shorter than within forage landscapes (#4). DT increased with brood demand  
388 until plateauing at mean demand values. DT was further associated in a quadratic fashion with  
389 both the Julian date and maximum temperature, peaking on Julian date 185 (4 July) and at  
390 26.1°C (Figure S10 and Figure S11).

391 *Hourly mean distance from nest box*

392 Overall mean DNB was 368 m (SD=563, Figure S4). While no single model could be considered  
393 the most predictive or parsimonious, models taking landscape context into account were clearly  
394 better supported (Table 2 and Table S1) . DNB was furthest within agro-forested landscapes (#5  
395 in Figure 4D) and was 49.3% further when compared to forage landscapes (#4). Compared to  
396 forage landscapes, DNB was 3.3% further within mixed row-crop landscapes (#3), and yet  
397 39.3% closer within corn/soybean landscapes (#2). The effect of corn/soybean cover was  
398 however highly dependent upon forest cover as the presence of remnant woodlots in landscapes

399 highly dominated by these crops (#1) was associated with DNB being 23.9% closer than within  
400 forage landscapes (#4). DNB increased significantly until plateauing at mean values of brood  
401 demand. Lastly, DNB was associated in a quadratic fashion with both the Julian date and  
402 maximum temperature, peaking on Julian date 184 (3 July) and at 26.7°C (Figure S12 and Figure  
403 S13).

## 404 **Discussion**

405 This study aimed to assess whether central-place foragers in agro-intensive landscapes expend  
406 more time or energy reaching food patches and traveling between them with the additional cost  
407 of settling for patches of lower quality, the combination of which resulting in lower food  
408 provisioning rates (Figure 1). We found that female Tree swallows provided food to their  
409 nestlings at lower rates within increasingly agro-intensive landscapes. The hourly rate of delivery  
410 of both bolus biomass and bolus number were indeed lowest within more agro-intensive  
411 landscapes and greatest within forage landscapes. Female Tree swallows traveled most and  
412 furthest from their nest within forest-dominated landscapes, and unexpectedly less and closer to  
413 their nest in agro-intensive compared to forage landscapes.

414 The relationship between the rate at which boluses were delivered and landscape context  
415 resembled that at which prey biomass was provided, suggesting that the biomass of individual  
416 boluses was similar throughout the agricultural intensification gradient studied (McCarty 2002).  
417 This outcome was corroborated by a supplemental analysis (Appendix S2, Table S2 and Table  
418 S3). Coupled with the result that females traveled furthest within predominantly forested  
419 landscapes and to a lesser extent forage landscapes, the relatively low variance in the biomass of  
420 individual boluses suggests that forage landscapes implied marginally greater travel times, yet  
421 more rapid loading curves, which subsequently led to greater gain rates than agro-intensive

422 landscapes (Figure 5). Lower gain rates within more agro-intensive landscapes may need to be  
423 compensated by parents elongating the entire foraging period of a given day, foraging more  
424 intensely when conditions allow, forgoing recuperation and foraging for themselves (Olsson et  
425 al. 2008, Schifferli et al. 2014). In all cases, increases in foraging effort may come at a cost to  
426 themselves through reduced body condition and thus potentially impactful to their future  
427 reproductive success (Stearns 1992, Reznick et al. 2000, Harrison et al. 2011, Lagrange 2015), as  
428 increases in effort may result in foraging parents being in too poor of body condition for molting  
429 prior to migration (Jenni-Eiermann and Jenni 1996, Rubolini et al. 2002). Furthermore, if parents  
430 cannot compensate for lowered gain rates, then broods may incur the cost through reduced  
431 growth rates or elevated mortality (Naef-Daenzer et al. 1999, Tremblay et al. 2004). In fact,  
432 evidence suggest food provisioning Tree swallows as well as their broods already incur these  
433 types of costs, as agro-intensive landscapes result in parents spending less time in the nest  
434 (Lamoureux 2010, Stanton et al. 2016), expressing reduced body condition (Pigeon et al. 2013,  
435 Stanton et al. 2017), and both reduced fledging success and nestling growth rates (Houle et al.  
436 2020, Garrett et al. 2021). Some of these natal effects are of concern as they may be carried over  
437 into later life stages (Harrison et al. 2011).

438 One fundamental characteristic of our gradient of agricultural intensification, and as an  
439 extension, most agricultural landscapes, is a loss of forest cover (Fischer and Lindenmayer  
440 2007). Within our study area, landscapes dominated by a mixture of forest cover and agricultural  
441 fields resulted in the lowest gain rates and furthest foraging distances. The foraging habitat of  
442 Tree swallows, as well as of most swallow species, is frequently recognized as being open  
443 terrestrial habitats or over large water surfaces (Evans et al. 2007, Boynton et al. 2020, Elgin et  
444 al. 2020). Thus, forest cover may reduce landscape functional connectivity for these species, at

445 least with respect to foraging (Bélisle 2005, Evens et al. 2018). In this way, as forest cover is  
446 reduced, the cover of foraging habitats, close to central places and conducive to Tree swallows,  
447 increases. In fact, second to forage landscapes, we found foraging rates were superior within  
448 agro-intensive landscapes with remnant forest cover. Residual woodlots within these agro-  
449 intensive landscapes add to the tree lines separating fields to increase the length of “forest”  
450 edges, where insect abundance tends to be greatest (Jokimäki et al. 1998, Evans et al. 2003,  
451 Boetzi et al. 2020). The fledging success of Tree swallows is greater in agro-intensive landscapes  
452 containing residual woodlots than ones denuded of forest cover (Garrett et al. 2021). It may  
453 therefore be hypothesized that the elevated insect abundance associated with these residual  
454 woodlots lead to greater gain rates and thus greater fledging success in this landscape context.

455 It should be noted that during the years covered by this study, areas intensively-managed for the  
456 growing of corn and soybean harbored elevated levels of pesticides in their surface waters,  
457 notably several herbicides (e.g. glyphosate, atrazine, S-metolachlor, imazethapyr) and  
458 neonicotinoid insecticides [e.g. clothianidin, thiacloprid, thiametoxam (Giroux 2019, Montiel-  
459 León et al. 2019)]. For instance, a previous study found that, on average, exposure to active  
460 pesticide agents within the food boluses was greatest within these landscapes (Sigouin 2020).  
461 The consumption or prolonged exposure to such chemicals can influence the neurological,  
462 endocrine and immunological systems of non-target animals, including vertebrates, via “skin”  
463 contact, breathing or consumption of food or water (Mayne et al. 2005, Mineau et al. 2013,  
464 Lopez-Antia et al. 2015, Pisa et al. 2015). Importantly, neurotoxic insecticides can induce  
465 anorexia, alter orientation and influence motor functions required for flight in birds (Eng et al.  
466 2017, 2019). Foraging within agro-intensive landscapes increases exposure of foragers to these

467 chemicals, likely reducing their motivation and ability to forage, and thus potentially resulting in  
468 decreased provisioning rates.

469 Finally, foraging is a metabolically expensive behavior, made worse when foraging bouts are  
470 during the nestling periods (Bryant and Tatner 2008, Yap et al. 2017). Therefore, incoming food  
471 need not only be frequent, but also energetically rich (Twining et al. 2018). The diversity and  
472 abundance of insects found within food boluses suggests that the nutritive value of food varies  
473 across the agricultural gradient of our study system (Bellavance et al. 2018). Most notably,  
474 insects with aquatic life stages (principally Ephemeroptera) are more abundant within the food  
475 boluses retrieved from forage landscapes than from those dominated by more agro-intensive  
476 cultures. These insects are greater in highly unsaturated omega-3 fatty acids (HUFA; (Twining et  
477 al. 2018). Nestlings with diets rich in HUFA can grow faster, gain a better body condition and  
478 have greater immunocompetence, leading to elevated brood survival and fledging success  
479 (Twining et al. 2018). Such effect can logically be extended to foraging adults. Subsequently, the  
480 energetic losses of foraging may be more easily replenished within forage landscapes.

481 Global climate change results in increased global temperatures and predicts increases in both the  
482 frequency and intensity of extreme weather events, such as prolonged periods of low or high  
483 temperatures or precipitation (Rahmstorf and Coumou 2011, Wuebbles et al. 2014) . Such  
484 weather events may drastically alter the availability of insects as a food resource due to their  
485 thermally dependent nature (Grüebler et al. 2008, Shipley et al. 2020, Garrett et al. 2021).  
486 Furthermore, recent evidence suggests Tree swallows may already be foraging at some upper  
487 thermal threshold (Tapper et al. 2020). Our results, combined with other pieces of evidence,  
488 suggests food provisioning adults may also be foraging at some upper energetic limit inasmuch,  
489 as proxies of body condition suggest they are lower where gain rates are lower (Pigeon et al.

490 2013, Stanton et al. 2016, 2017). It is thus imperative that future work focuses not only on how  
491 agricultural practices or global climate change independently impact declining avian species, but  
492 also on how these factors may interact with one another. This importance is due to the ability of  
493 growing broods or breeding parents to manage extreme weather is potentially lower within more  
494 agro-intensive landscapes (Grue et al. 1997, Evans et al. 2003, Pérez et al. 2008, Eng et al. 2019,  
495 Tapper et al. 2020). Finally, our results provide evidence that aerial insectivore declines may be  
496 related to agricultural intensification through a trophic pathway.

## 497 **Acknowledgments**

498 We are indebted to the farm owners who kindly accepted to partake in our long-term study since  
499 2004. Sincere thanks to the many graduate students, field and lab assistants who helped collect,  
500 enter, and proof data throughout the years, notably with respect to insect sample processing. This  
501 work was conducted under the approval of the animal care committee of the Université de  
502 Sherbrooke and was financially supported by Natural Sciences and Engineering Research  
503 Council of Canada discovery grants to FP, DG and MB, two team research grants from the Fonds  
504 de recherche du Québec—Nature et technologies to FP, DG and MB, by the Canada Research  
505 Chairs program to FP and MB, as well as by the Canadian Foundation for Innovation to FP, DG  
506 and MB, the Canadian Wildlife Service of Environment and Climate Change Canada and the  
507 Université de Sherbrooke.



## 508 Tables and figures

509 **Table 1:** Mean  $\pm$  SD of covariates used to model response variables. Covariates for the  
 510 hourly number of boluses and total bolus biomass delivered to nestlings were representative of  
 511 the hourly food provisioning sessions conducted between 2011 and 2016. Covariates of foraging  
 512 distances were calculated for the hourly interval's representative of the hourly GPS locations.  
 513 Dashes imply the covariate was not used in the modeling of the response variable. Covariate  
 514 groups identify which covariates were present within models found in Table 1.

| Covariate                           | Acronym | Unit                      | Covariate group | Biomass                | Number                 | Foraging distance    |
|-------------------------------------|---------|---------------------------|-----------------|------------------------|------------------------|----------------------|
| Starting time                       | ST      | Time                      | Base            | 262.31 $\pm$<br>150.16 | 251.57 $\pm$<br>153.55 | -                    |
| Maximum temperature                 | TMAX    | °C                        | Base/Food       | 26.20 $\pm$<br>4.08    | 25.54 $\pm$<br>3.94    | 20.85 $\pm$<br>5.08  |
| Brood demand proxy                  | DM      | Brood size *<br>Brood age | Base/Demand     | 40.50 $\pm$<br>13.89   | 39.14 $\pm$<br>12.8    | 29.48 $\pm$<br>10.87 |
| Local surface water (1 km)          | LSW     | %                         | Base/ LSW       | 0.80 $\pm$<br>1.43     | 0.87 $\pm$<br>1.58     | 1.38 $\pm$<br>1.68   |
| Regional surface water (10 km)      | RSW     | %                         | Base            | 1.58 $\pm$<br>1.46     | 1.56 $\pm$<br>1.42     | 2.62 $\pm$<br>1.93   |
| Prey availability (Diptera biomass) | PA      | g                         | Food            | 0.02 $\pm$<br>0.01     | 0.02 $\pm$<br>0.01     | -                    |
| Site score Comp.1                   | Comp.1  | -                         | Land            | 0.34 $\pm$<br>1.73     | 0.42 $\pm$<br>1.72     | 0.07 $\pm$<br>2.35   |
| Site score Comp.2                   | Comp.2  | -                         | Land            | -0.04 $\pm$<br>0.88    | -0.01 $\pm$<br>0.86    | -0.09 $\pm$<br>1.38  |
| Julian day                          | JD      | days                      | Base            | -                      | -                      | 170.83 $\pm$<br>7.04 |

515

516  
 517 **Table 2:** Standardized coefficient estimates and their 95% confidence intervals included in  
 518 the top model of each response variable. See Table 1 for definitions of covariates and Table S1  
 519 for outcome of model selection. Coefficients in bold indicate confidence intervals not  
 520 overlapping zero. Numbers next to acronym refer to the order of the polynomial term.

| Covariate        | Biomass                               | Delivery                              | Travel                                | Distance                              |
|------------------|---------------------------------------|---------------------------------------|---------------------------------------|---------------------------------------|
| Comp.1           | 0.03<br>(-0.01, 0.07)                 | 0.02<br>(-0.04, 0.07)                 | <b>-0.11</b><br><b>(-0.16, -0.06)</b> | <b>-0.08</b><br><b>(-0.15, -0.02)</b> |
| Comp.1:Comp.2    | <b>0.07</b><br><b>(0.02, 0.11)</b>    | <b>0.09</b><br><b>(0.02, 0.16)</b>    | <b>-0.13</b><br><b>(-0.19, -0.06)</b> | <b>-0.10</b><br><b>(-0.17, -0.03)</b> |
| Comp.2           | <b>-0.10</b><br><b>(-0.18, -0.01)</b> | <b>-0.15</b><br><b>(-0.27, -0.02)</b> | 0.07<br>(-0.02, 0.16)                 | 0.03<br>(-0.10, 0.15)                 |
| Female age (ASY) | 0.05<br>(-0.11, 0.21)                 | 0.13<br>(-0.13, 0.40)                 | -                                     | -                                     |
| Rain (Yes)       | -0.16<br>(-0.40, 0.07)                | -0.18<br>(-0.52, 0.16)                | -                                     | -                                     |
| DM1              | <b>4.04</b><br><b>(1.99, 6.10)</b>    | <b>9.78</b><br><b>(7.09, 12.47)</b>   | <b>3.11</b><br><b>(0.56, 5.66)</b>    | <b>4.09</b><br><b>(1.17, 7.01)</b>    |
| DM2              | <b>-5.21</b><br><b>(-7.29, -3.12)</b> | <b>-3.34</b><br><b>(-6.11, -0.57)</b> | -1.86<br>(-4.35, 0.64)                | <b>-4.23</b><br><b>(-6.99, -1.48)</b> |
| DM3              | <b>2.81</b><br><b>(0.89, 4.72)</b>    | 1.07<br>(-1.64, 3.78)                 | -0.01<br>(-2.78, 2.76)                | 0.17<br>(-2.94, 3.28)                 |
| ST1              | 2.08<br>(-0.03, 4.18)                 | 2.53<br>(-0.19, 5.26)                 | -                                     | -                                     |
| ST2              | <b>-2.33</b><br><b>(-4.43, -0.22)</b> | <b>-3.02</b><br><b>(-5.61, -0.43)</b> | -                                     | -                                     |
| TMAX1            | -0.23<br>(-2.43, 1.97)                | 0.13<br>(-2.58, 2.83)                 | <b>8.84</b><br><b>(6.43, 11.25)</b>   | <b>8.28</b><br><b>(5.67, 10.90)</b>   |
| TMAX2            | <b>-3.87</b><br><b>(-6.04, -1.69)</b> | <b>-3.99</b><br><b>(-6.75, -1.23)</b> | <b>-5.14</b><br><b>(-7.48, -2.80)</b> | <b>-4.46</b><br><b>(-7.02, -1.89)</b> |
| LSW              | <b>-0.08</b><br><b>(-0.14, -0.01)</b> | <b>-0.12</b><br><b>(-0.22, -0.02)</b> | 0.16<br>(-0.01, 0.33)                 | 0.05<br>(-0.15, 0.25)                 |
| LSW:RSW          | 0.04<br>(-0.05, 0.14)                 | 0.12<br>(-0.03, 0.28)                 | <b>-0.22</b><br><b>(-0.41, -0.03)</b> | -0.10<br>(-0.35, 0.14)                |
| RSW              | 0.06<br>(-0.01, 0.13)                 | 0.05<br>(-0.06, 0.16)                 | <b>-0.27</b><br><b>(-0.41, -0.13)</b> | <b>-0.23</b><br><b>(-0.43, -0.04)</b> |
| JD1              | -                                     | -                                     | <b>11.17</b><br><b>(8.04, 14.30)</b>  | <b>11.85</b><br><b>(8.14, 15.56)</b>  |
| JD2              | -                                     | -                                     | <b>-4.77</b><br><b>(-7.54, -1.99)</b> | <b>-5.20</b><br><b>(-8.43, -1.97)</b> |
| RSW:Comp.1       | -                                     | -                                     | <b>-0.07</b><br><b>(-0.13, -0.01)</b> | -                                     |

521

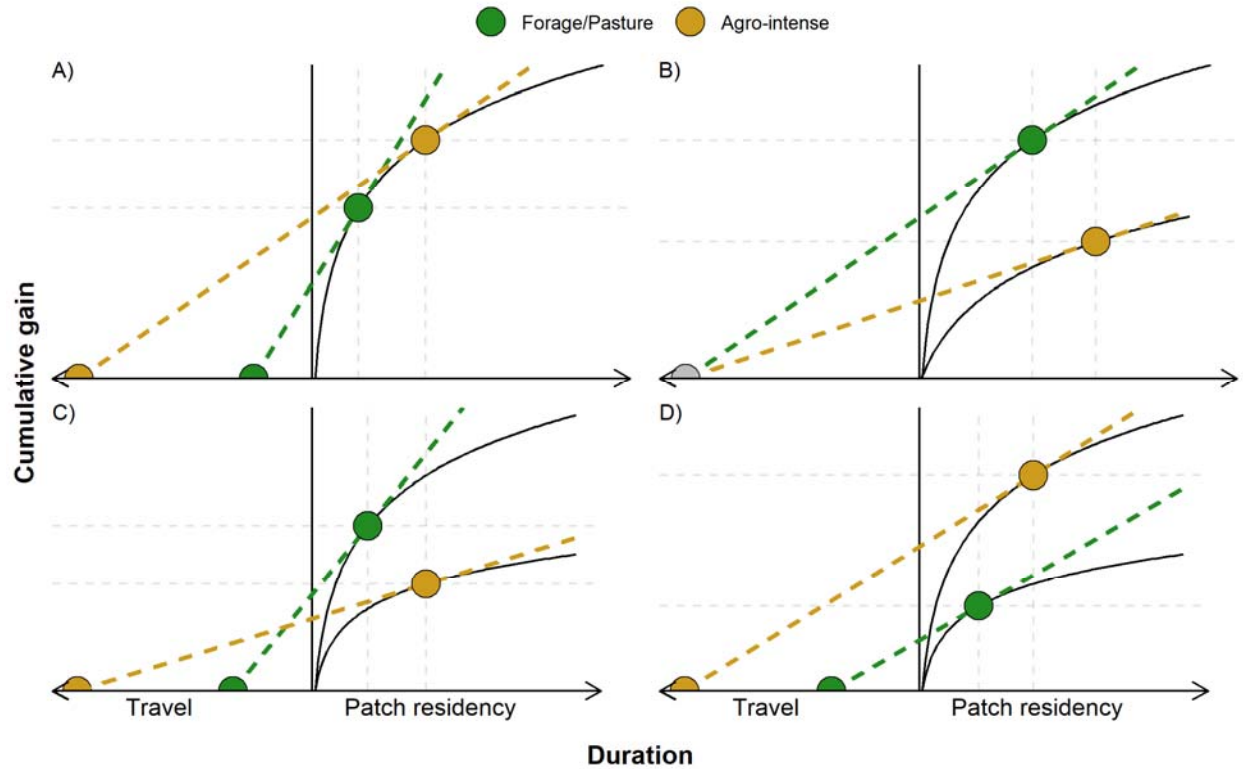

522

523 **Figure 1:** Optimal energetic gain rates expected under different scenarios where food  
524 provisioning individuals forage according to the marginal value theorem and experience different  
525 travel times and gain curves that depend (or not) on landscape context. The x-axis is the total  
526 duration of a foraging bout composed of both the travel time to foraging patches and the time  
527 spent foraging within patches. Relationship between cumulative gain and patch residency time is  
528 represented by a decelerating gain curve. The rate of energetic gains of a foraging bout is given  
529 by the ratio between the cumulative gain and the bout's total duration. Optimal gain rate is thus  
530 graphically represented by the slope of the dashed line connecting travel time to the tangent of  
531 the gain curve. Assuming more agro-intensive landscapes result in more dispersed or poorer  
532 foraging patches, landscape mediated differences in energetic gains potentially occur through  
533 longer travel times (A and C) or lower instantaneous gain rates while exploiting patches (B and

534 C). Lastly, shorter travel times can counterbalance slower gain rates within food patches,  
535 resulting in different food provisioning rates and yet similar energetic gain rates between  
536 contrasting landscapes (D).

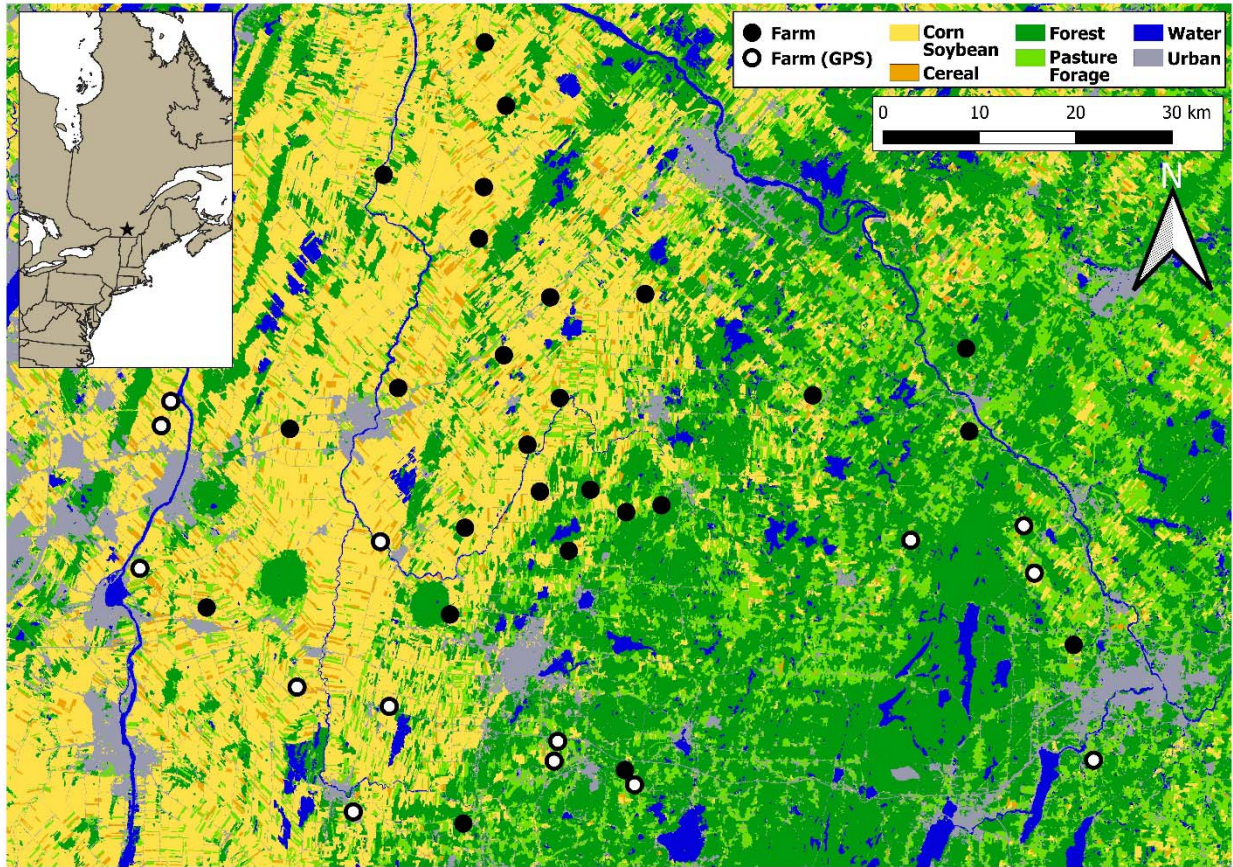

537

538 **Figure 2:** Map of study system. Each point represents the location of a farm, filled white  
539 points are farms where GPS were applied to 43 females. Underlying image represents the  
540 agricultural gradient derived from the Annual crop inventory (AAFC 2013). Light yellow  
541 represents the more agro-intensive areas while light green represents less agro-intensive areas.

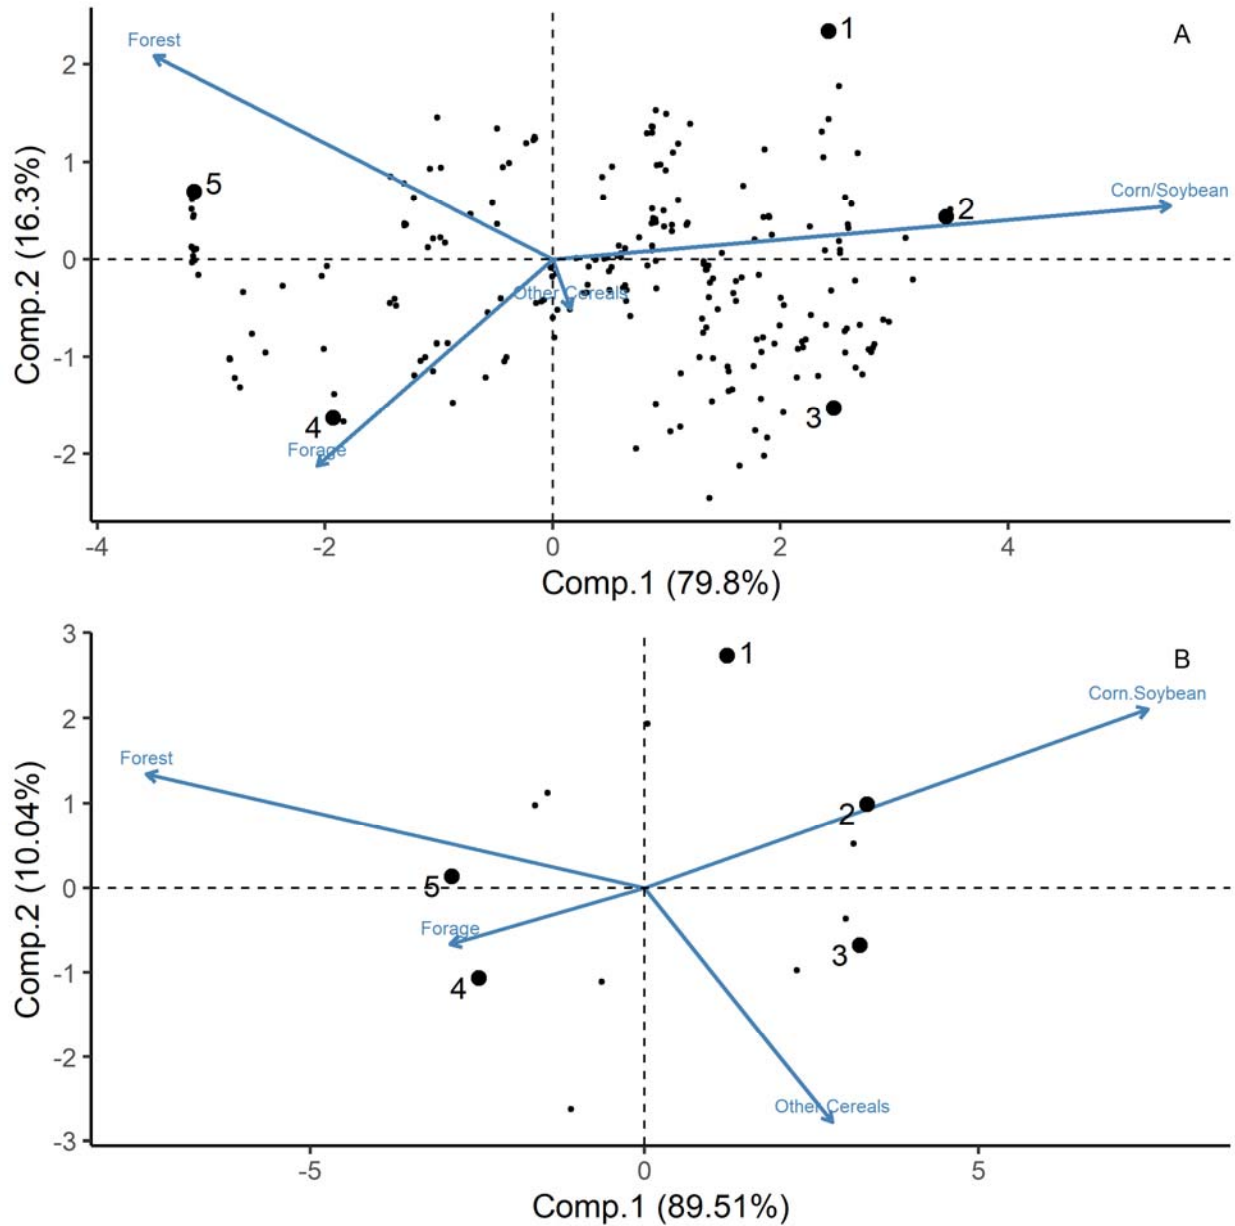

542

543 **Figure 3:** Results of the robust PCA for compositional data including the site scores of the  
544 five landscape context scenarios for the food provisioning sessions (A) and foraging distance  
545 studies (B). Points in the background represent the site scores assigned to each food provisioning  
546 session. The arrows lengths are eigenvectors representing the direction and magnitude of  
547 correlation between habitats. The five landscape scenarios are: ones dominated by corn or

548 soybean with 8.8% forest cover (Corn/soybean with forest, 1), ones denuded of forest cover and  
549 dominated by only corn or soybean (Corn/Soybean,2), ones denuded of forest cover and  
550 dominated by a mixture of corn, soybean and cereals (mixed row crop, 3), ones minimizing  
551 forest cover (9.0%) and dominated by forage crops (Forage, 4), and agricultural landscapes with  
552 69.0% forest cover (Agro-forested, 5)

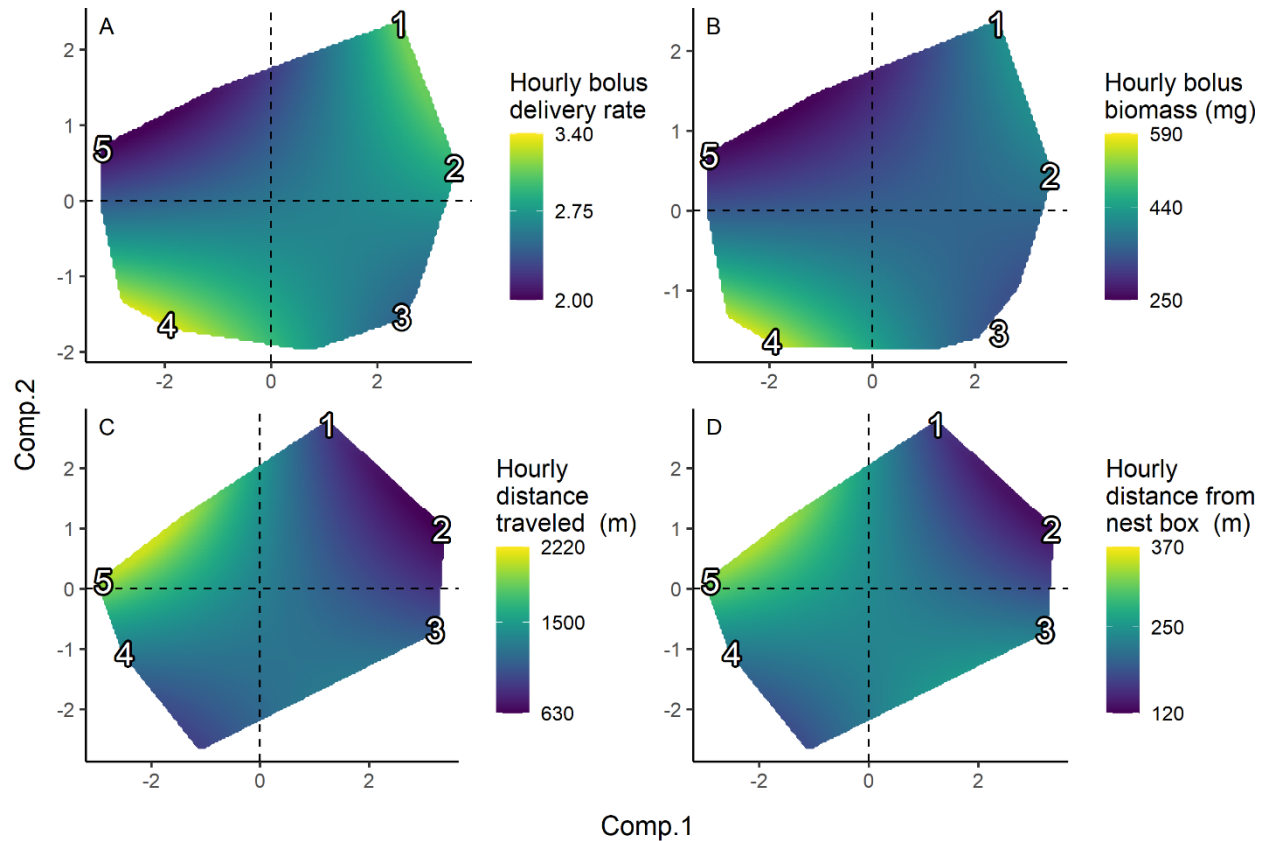

553

554 **Figure 4:** Response surfaces of the principal response variables against the first two  
555 components deriving the landscape context. Deeper blue represents lower predicted values while  
556 yellow represents greater values. Predicted hourly bolus delivery rate (A), hourly bolus biomass  
557 (B) delivered to nestlings. Predicted hourly distance traveled (C) and hourly distance from nest  
558 box (D). Numbers in each panel are landscape context scenarios and represent the predominant  
559 types of landscape contexts experienced across the agricultural gradient and correspond to the  
560 points in numbers in Figure 3. Scenarios are: (1) ones dominated by corn or soybean with 8.8%  
561 forest cover (corn/soybean with forest); (2) ones denuded of forest cover and dominated by only  
562 corn or soybean (corn/soybean); (3) ones denuded of forest cover and dominated by a mixture of  
563 corn, soybean and cereals (mixed row crops); (4) ones with 9.0% forest cover and dominated by



564 forage crops (forage); and (5) landscapes with 69.0% forest cover and few cultivated parcels  
565 typically devoted to forage crops (agro-forested).

566

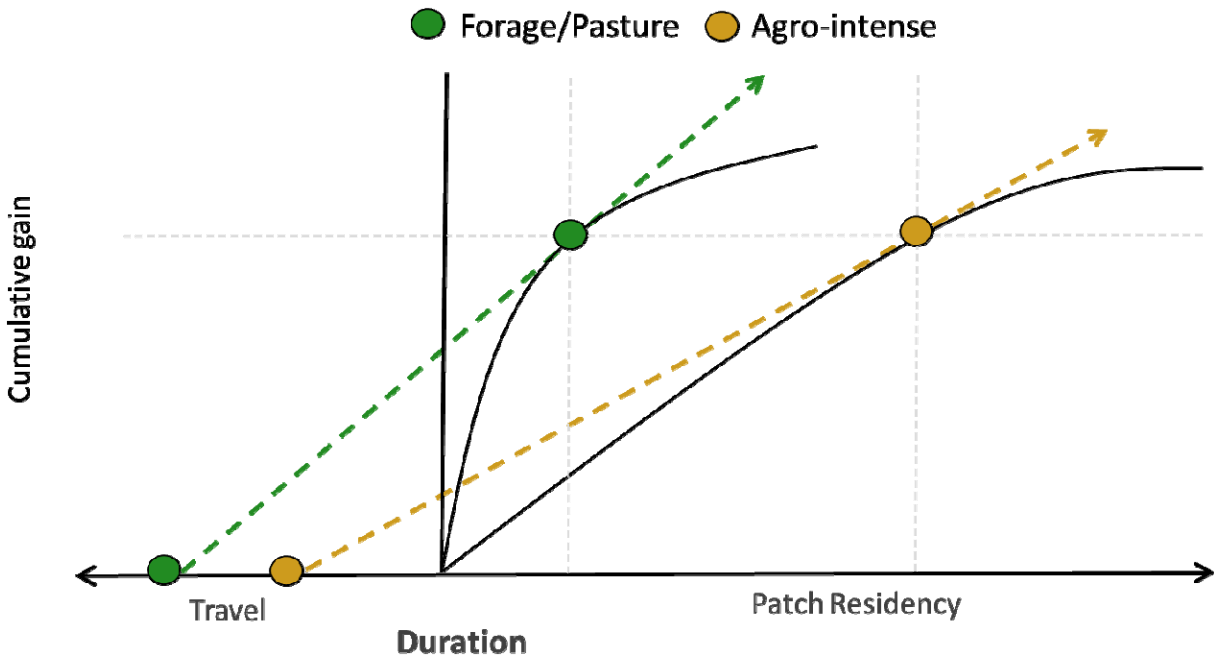

567

568 **Figure 5:** Reasoning underlying our hypothesis that food patches within forage landscapes  
569 allow for a more rapid accumulation of food resources than those found in more agro-intensive  
570 landscapes. Assuming that food provisioning Tree swallow females foraged according to the  
571 marginal value theorem, and given we found (1) that the individual bolus biomass was similar  
572 across the agricultural intensification gradient, (2) that travel distances were greater in forage  
573 than in agro-intensive landscapes, then only a lower gain curve in agro-intensive landscapes is  
574 compatible with our findings that hourly bolus biomass and hourly number of boluses delivered  
575 were higher in forage than in agro-intensive landscapes. Gain rate is graphically represented by the  
576 slope of the dashed line connecting mean travel time to the tangent of the gain curve.

577

## 578 **Bibliography**

- 579 Agriculture and Agri-Food Canada (AAFC). 2018. Annual Crop Inventory.  
580 <https://open.canada.ca/data/en/dataset/>.
- 581 Bélanger, L., and M. Grenier. 2002. Agriculture intensification and forest fragmentation in the  
582 St. Lawrence valley, Québec, Canada. *Landscape Ecology* 17:495–507.
- 583 Belant, J. L., L. A. Tyson, and T. W. Seamans. 2000. Wildlife Management: Cropping to  
584 Manage or Managing to Crop? *Wildlife Society Bulletin* 28:774–779.
- 585 Bélisle, M. 2005. Measuring landscape connectivity: the challenge of behavioral landscape  
586 ecology. *Ecology* 86:1988–1995.
- 587 Bellavance, V., M. Bélisle, J. Savage, F. Pelletier, and D. Garant. 2018. Influence of agricultural  
588 intensification on prey availability and nestling diet in Tree Swallows (*Tachycineta*  
589 *bicolor*). *Canadian Journal of Zoology* 96:1053–1065.
- 590 Benton, T. G., D. M. Bryant, L. Cole, and H. Q. P. Crick. 2002. Linking agricultural practice to  
591 insect and bird populations: a historical study over three decades. *Journal of Applied*  
592 *Ecology* 39:673–687.
- 593 Benton, T. G., J. A. Vickery, and J. D. Wilson. 2003. Farmland biodiversity: is habitat  
594 heterogeneity the key? *Trends in Ecology & Evolution* 18:182–188.
- 595 Berzins, L. L., R. D. Dawson, C. A. Morrissey, and R. G. Clark. 2020. The relative contribution  
596 of individual quality and changing climate as drivers of lifetime reproductive success in a  
597 short-lived avian species. *Scientific Reports* 10:19766.
- 598 Bivand, R. S., E. J. Pebesma, and V. Gomez-Rubio. 2013. *Applied spatial data analysis with R*,  
599 Second edition. Springer.
- 600 Bivand, R. S., and C. Rundel. 2019. Package ‘rgeos’ - Interface to Geometry Engine - Open  
601 Source (‘GEOS’).
- 602 Blasco-Moreno, A., M. Pérez-Casany, P. Puig, M. Morante, and E. Castells. 2019. What does  
603 a zero mean? Understanding false, random and structural zeros in ecology. *Methods in*  
604 *Ecology and Evolution* 10:949–959.
- 605 Boetzl, F. A., M. Schuele, J. Krauss, and I. Steffan-Dewenter. 2020. Pest control potential of  
606 adjacent agri-environment schemes varies with crop type and is shaped by landscape  
607 context and within-field position. *Journal of Applied Ecology* 57:1482–1493.
- 608 Bowler, D. E., H. Heldbjerg, A. D. Fox, M. Jong, and K. Böhning-Gaese. 2019. Long-term  
609 declines of European insectivorous bird populations and potential causes. *Conservation*

- 610 Biology 33:1120–1130.
- 611 Boynton, C. K., N. A. Mahony, and T. D. Williams. 2020. Barn Swallow (*Hirundo rustica*)  
612 fledglings use crop habitat more frequently in relation to its availability than pasture and  
613 other habitat types. *The Condor* 122.
- 614 Brooks, M. E., K. Kristensen, K. J. van Benthem, A. Magnusson, C. W. Berg, A. Nielsen, H. J.  
615 Skaug, M. Mächler, and B. M. Bolker. 2017. glmmTMB balances speed and flexibility  
616 among packages for zero-inflated generalized linear mixed modeling. *R Journal*.
- 617 Bruun, M., and H. G. Smith. 2003. Landscape composition affects habitat use and foraging flight  
618 distances in breeding European starlings. *Biological Conservation* 114:179–187.
- 619 Bryant, D. M., and P. Tatner. 2008. Intraspecific variation in avian energy expenditure: correlates  
620 and constraints. *Ibis* 133:236–245.
- 621 Burnham, K. P., and D. R. Anderson. 2002. *Model Selection and Multimodel Inference*. second.  
622 Springer.
- 623 Canada, N. R. 2020. National Hydro Network - NHN - GeoBase Series.  
624 [https://www.nrcan.gc.ca/science-and-data/science-and-research/earth-](https://www.nrcan.gc.ca/science-and-data/science-and-research/earth-sciences/geography/topographic-information/geobase-surface-water-program-geeau/national-hydrographic-network/21361)  
625 [sciences/geography/topographic-information/geobase-surface-water-program-](https://www.nrcan.gc.ca/science-and-data/science-and-research/earth-sciences/geography/topographic-information/geobase-surface-water-program-geeau/national-hydrographic-network/21361)  
626 [geeau/national-hydrographic-network/21361](https://www.nrcan.gc.ca/science-and-data/science-and-research/earth-sciences/geography/topographic-information/geobase-surface-water-program-geeau/national-hydrographic-network/21361).
- 627 Catry, I., A. M. A. Franco, and F. Moreira. 2014. Easy but ephemeral food: exploring the trade-  
628 offs of agricultural practices in the foraging decisions of Lesser Kestrels on farmland. *Bird*  
629 *Study* 61:447–456.
- 630 Charnov, E. L. 1976. Optimal foraging, the marginal value theorem. *Theoretical Population*  
631 *Biology* 9:129–136.
- 632 Courtois, È. 2020. Sélection De Nichoir Chez L’hirondelle Bicolore (*Tachycineta Bicolor*) En  
633 Milieux Agricoles□: Une Trappe Écologique?
- 634 Cox, A. R., R. J. Robertson, Á. Z. Lendvai, K. Everitt, and F. Bonier. 2019. Rainy springs linked  
635 to poor nestling growth in a declining avian aerial insectivore (*Tachycineta bicolor*).  
636 *Proceedings of the Royal Society B: Biological Sciences* 286:20190018.
- 637 Dawson, R. D., and G. R. Bortolotti. 2000. Reproductive Success of American Kestrels: The  
638 Role of Prey Abundance and Weather. *The Condor* 102:814–822.
- 639 DiBartolomeis, M., S. Kegley, P. Mineau, R. Radford, and K. Klein. 2019. An assessment of  
640 acute insecticide toxicity loading (AITL) of chemical pesticides used on agricultural land in  
641 the United States. *PLOS ONE* 14:e0220029.

- 642 Dreelin, R. A., J. R. Shipley, and D. W. Winkler. 2018. Flight Behavior of Individual Aerial  
643 Insectivores Revealed by Novel Altitudinal Dataloggers. *Frontiers in Ecology and*  
644 *Evolution* 6:1–7.
- 645 Drent, R. H., and S. Daan. 1980. The Prudent Parent: Energetic Adjustments in Avian Breeding.  
646 *Ardea* 68:225–252.
- 647 Ducks Unlimited. 2020. Ducks unlimited GIS mapping applications.  
648 <https://www.ducks.ca/initiatives/gis-mapping-applications/>.
- 649 Dunn, P. O., D. W. Winkler, L. a. Whittingham, S. J. Hannon, and R. J. Robertson. 2011. A test  
650 of the mismatch hypothesis: How is timing of reproduction related to food abundance in an  
651 aerial insectivore? *Ecology* 92:450–461.
- 652 Elgin, A. S., R. G. Clark, and C. A. Morrissey. 2020. Tree Swallow selection for wetlands in  
653 agricultural landscapes predicted by central-place foraging theory. *The Condor* 122:1–12.
- 654 Eng, M. L., B. J. M. Stutchbury, and C. A. Morrissey. 2017. Imidacloprid and chlorpyrifos  
655 insecticides impair migratory ability in a seed-eating songbird. *Scientific Reports* 7:15176.
- 656 Eng, M. L., B. J. M. Stutchbury, and C. A. Morrissey. 2019. A neonicotinoid insecticide reduces  
657 fueling and delays migration in songbirds. *Science* 365:1177–1180.
- 658 English, P. A., J. J. Nocera, B. A. Pond, and D. J. Green. 2017. Habitat and food supply across  
659 multiple spatial scales influence the distribution and abundance of a nocturnal aerial  
660 insectivore. *Landscape Ecology* 32:343–359.
- 661 Evans, K. L., R. B. Bradbury, and J. D. Wilson. 2003. Selection of hedgerows by Swallows  
662 *Hirundo rustica* foraging on farmland: the influence of local habitat and weather. *Bird*  
663 *Study* 50:8–14.
- 664 Evans, K. L., J. D. Wilson, and R. B. Bradbury. 2007. Effects of crop type and aerial invertebrate  
665 abundance on foraging barn swallows *Hirundo rustica*. *Agriculture, Ecosystems &*  
666 *Environment* 122:267–273.
- 667 Evens, R., N. Beenaerts, T. Neyens, N. Witters, K. Smeets, and T. Artois. 2018. Proximity of  
668 breeding and foraging areas affects foraging effort of a crepuscular, insectivorous bird.  
669 *Scientific Reports* 8:3008.
- 670 Filzmoser, P., K. Hron, and C. Reimann. 2009. Principal component analysis for compositional  
671 data with outliers. *Environmetrics* 20:621–632.
- 672 Fischer, J., and D. B. Lindenmayer. 2007. Landscape modification and habitat fragmentation: a  
673 synthesis. *Global Ecology and Biogeography* 16:265–280.

- 674 Garrett, D. R., F. Pelletier, D. Garant, and M. Bélisle. 2021. Combined influence of food  
675 availability and agricultural intensification on a declining aerial insectivore. *bioRxiv*.
- 676 Geary, B., P. L. Leberg, K. M. Purcell, S. T. Walter, and J. Karubian. 2020. Breeding Brown  
677 Pelicans Improve Foraging Performance as Energetic Needs Rise. *Scientific Reports*  
678 10:1686.
- 679 Ghilain, A., and M. Bélisle. 2008. Breeding success of tree swallows along a gradient of  
680 agricultural intensification. *Ecological Applications* 18:1140–1154.
- 681 Giroux, I. 2019. Présence de pesticides dans l'eau au Québec: Portrait et tendances dans les  
682 zones de maïs et de soya – 2015 à 2017, Québec, ministère de l'Environnement et de la  
683 Lutte contre les changements climatiques, Direction générale du suivi de l'état de l'environ.
- 684 Grue, C. E., P. L. Gibert, and M. E. Seeley. 1997. Neurophysiological and Behavioral Changes  
685 in Non-Target Wildlife Exposed to Organophosphate and Carbamate Pesticides:  
686 Thermoregulation, Food Consumption, and Reproduction. *American Zoologist* 37:369–388.
- 687 Grübler, M. U., M. Morand, and B. Naef-Daenzer. 2008. A predictive model of the density of  
688 airborne insects in agricultural environments. *Agriculture, Ecosystems & Environment*  
689 123:75–80.
- 690 Hallmann, C. A., R. P. B. Foppen, C. A. M. van Turnhout, H. de Kroon, and E. Jongejans. 2014.  
691 Declines in insectivorous birds are associated with high neonicotinoid concentrations.  
692 *Nature* 511:341–343.
- 693 Haroune, L., R. Cassoulet, M.-P. Lafontaine, M. Bélisle, D. Garant, F. Pelletier, H. Cabana, and  
694 J.-P. Bellenger. 2015. Liquid chromatography-tandem mass spectrometry determination for  
695 multiclass pesticides from insect samples by microwave-assisted solvent extraction  
696 followed by a salt-out effect and micro-dispersion purification. *Analytica Chimica Acta*  
697 891:160–170.
- 698 Harrison, X. A., J. D. Blount, R. Inger, D. R. Norris, and S. Bearhop. 2011. Carry-over effects as  
699 drivers of fitness differences in animals. *Journal of Animal Ecology* 80:4–18.
- 700 Hartig, F. 2020. DHARMA: Residual Diagnostics for Hierarchical (Multi-Level / Mixed)  
701 Regression Models. R package version 0.2.0.
- 702 Hinsley, S. A. 2000. The costs of multiple patch use by birds. *Landscape Ecology* 15:765–775.
- 703 Houle, C., F. Pelletier, M. Bélisle, and D. Garant. 2020. Impacts of environmental heterogeneity  
704 on natural selection in a wild bird population. *Evolution* 74:1142–1154.
- 705 Hussell, D. J. T. 1983. Age and Plumage Color in Female Tree Swallows. *Journal of Field*  
706 *Ornithology* 54:312–318.

- 707 Imlay, T. L., H. A. R. Mann, and M. L. Leonard. 2017. No effect of insect abundance on nestling  
708 survival or mass for three aerial insectivores. *Avian Conservation and Ecology* 12:art19.
- 709 Jenni-Eiermann, S., and L. Jenni. 1996. Metabolic Differences Between the Postbreeding,  
710 Moulting and Migratory Periods in Feeding and Fasting Passerine Birds. *Functional*  
711 *Ecology* 10:62.
- 712 Jobin, B., J.-L. DesGranges, and C. Boutin. 1996. Population trends in selected species of  
713 farmland birds in relation to recent developments in agriculture in the St. Lawrence Valley.  
714 *Agriculture, Ecosystems & Environment* 57:103–116.
- 715 Johnson, M. E., and M. P. Lombardo. 2000. Nestling Tree Swallow (*Tachycineta bicolor*) Diets  
716 in an Upland Old Field in Western Michigan. *The American Midland Naturalist* 144:216–  
717 219.
- 718 Jokimäki, J., E. Huhta, J. Itämies, and P. Rahko. 1998. Distribution of arthropods in relation to  
719 forest patch size, edge, and stand characteristics. *Canadian Journal of Forest Research*  
720 28:1068–1072.
- 721 Jones, G. 1987. Parent-offspring resource allocation in swallows during nestling rearing: an  
722 experimental study. *Ardea* 75:145–168.
- 723 Jones, G. 1988. Concurrent Demands of Parent and Offspring Swallows *Hirundo rustica* in a  
724 Variable Feeding Environment. *Ornis Scandinavica* 19:145.
- 725 Lagrange, P. 2015. Déterminants De La Survie Et De La Dispersion De Reproduction Par Une  
726 Approche Capture-Marquage-Recapture Chez L’Hirondelle Bicolore Au Québec.
- 727 Lamoureux, S. 2010. Impact de l’intensification agricole sur l’effort parental, la croissance et la  
728 survie des oisillons chez l’hirondelle bicolore (*Tachycineta bicolor*). Université de  
729 Sherbrooke.
- 730 Lessard, A., A. Bourret, M. Bélisle, F. Pelletier, and D. Garant. 2014. Individual and  
731 environmental determinants of reproductive success in male tree swallow (*Tachycineta*  
732 *bicolor*). *Behavioral Ecology and Sociobiology* 68:733–742.
- 733 Lo, S., and S. Andrews. 2015. To transform or not to transform: using generalized linear mixed  
734 models to analyse reaction time data. *Frontiers in Psychology* 6:1–16.
- 735 Lopez-Antia, A., M. E. Ortiz-Santaliestra, F. Mougeot, and R. Mateo. 2015. Imidacloprid-treated  
736 seed ingestion has lethal effect on adult partridges and reduces both breeding investment  
737 and offspring immunity. *Environmental Research* 136:97–107.
- 738 Malaj, E., L. Freistadt, and C. A. Morrissey. 2020. Spatio-Temporal Patterns of Crops and  
739 Agrochemicals in Canada Over 35 Years. *Frontiers in Environmental Science* 8:1–12.

- 740 Mayne, G. J., C. A. Bishop, P. A. Martin, H. J. Boermans, and B. Hunter. 2005. Thyroid  
741 Function in Nestling Tree Swallows and Eastern Bluebirds Exposed to Non-Persistent  
742 Pesticides and p, p-DDE in Apple Orchards of Southern Ontario, Canada. *Ecotoxicology*  
743 14:381–396.
- 744 Mazerolle, M. J. 2020. AICcmodavg: model selection and multimodel inference based on  
745 (Q)AIC(c).
- 746 McCarty, J. P. 2002. The number of visits to the nest by parents is an accurate measure of food  
747 delivered to nestlings in Tree Swallows. *Journal of Field Ornithology* 73:9–14.
- 748 McCarty, J. P., and D. W. Winkler. 1999. Foraging Ecology and Diet Selectivity of Tree  
749 Swallows Feeding Nestlings. *The Condor* 101:246–254.
- 750 McClenaghan, B., K. C. R. Kerr, and E. Nol. 2019. Does prey availability affect the reproductive  
751 performance of Barn Swallows (*Hirundo rustica*) breeding in Ontario, Canada? *Canadian*  
752 *Journal of Zoology* 97:979–987.
- 753 Mengelkoch, J. M., G. J. Niemi, and R. R. Regal. 2004. Diet of the nestling tree swallow. *The*  
754 *Condor* 106:423–429.
- 755 Michel, N. L., A. C. Smith, R. G. Clark, C. A. Morrissey, and K. A. Hobson. 2016. Differences  
756 in spatial synchrony and interspecific concordance inform guild-level population trends for  
757 aerial insectivorous birds. *Ecography* 39:774–786.
- 758 Mineau, P., C. Palmer, J. Melrose, R. Perroy, S. Careas, D. R. Tobergte, and S. Curtis. 2013.  
759 Summary for Policymakers. Pages 1–30 *in* Intergovernmental Panel on Climate Change,  
760 editor. *Climate Change 2013 - The Physical Science Basis*. Cambridge University Press.
- 761 Montiel-León, J. M., G. Munoz, S. Vo Duy, D. T. Do, M. Vaudreuil, K. Goeury, F. Guillemette,  
762 M. Amyot, and S. Sauvé. 2019. Widespread occurrence and spatial distribution of  
763 glyphosate, atrazine, and neonicotinoids pesticides in the St. Lawrence and tributary rivers.  
764 *Environmental Pollution* 250:29–39.
- 765 Naef-Daenzer, B., L. F. Keller, B. N. Daenzer, and L. F. Keller. 1999. The foraging performance  
766 of great and blue tits (*Parus major* and *P. caeruleus*) in relation to caterpillar development,  
767 and its consequences for nestling growth and fledging weight. *Journal of Animal Ecology*  
768 68:708–718.
- 769 Nebel, S., A. Mills, J. D. McCracken, and P. D. Taylor. 2010. Declines of Aerial Insectivores in  
770 North America Follow a Geographic Gradient. *Avian Conservation and Ecology* 5:art1.
- 771 Nocera, J. J., J. M. Blais, D. V. Beresford, L. K. Finity, C. Grooms, L. E. Kimpe, K. Kyser, N.  
772 Michelutti, M. W. Reudink, and J. P. Smol. 2012. Historical pesticide applications



- 773 coincided with an altered diet of aerially foraging insectivorous chimney swifts.  
774 Proceedings of the Royal Society B: Biological Sciences 279:3114–3120.
- 775 Olsson, O., J. S. Brown, and K. L. Helf. 2008. A guide to central place effects in foraging.  
776 Theoretical Population Biology 74:22–33.
- 777 Orians, G. H., and E. Pearson. 1979. On the theory of central place foraging. Analysis of  
778 Ecological Systems:154–1177.
- 779 Pebesma, E. J. 2018. Simple Features for R: Standardized Support for Spatial Vector Data. The  
780 R Journal 10:439.
- 781 Pérez, J. H., D. R. Ardia, E. K. Chad, and E. D. Clotfelter. 2008. Experimental heating reveals  
782 nest temperature affects nestling condition in tree swallows (*Tachycineta bicolor*). Biology  
783 Letters 4:468–471.
- 784 Pigeon, G., R. Baeta, M. Bélisle, D. Garant, and F. Pelletier. 2013. Effects of agricultural  
785 intensification and temperature on immune response to phytohemagglutinin in Tree  
786 Swallows (*Tachycineta bicolor*). Canadian Journal of Zoology 91:56–63.
- 787 Pisa, L. W., V. Amaral-Rogers, L. P. Belzunces, J. M. Bonmatin, C. A. Downs, D. Goulson, D.  
788 P. Kreuzweiser, C. Krupke, M. Liess, M. McField, C. A. Morrissey, D. A. Noome, J.  
789 Settele, N. Simon-Delso, J. D. Stark, J. P. Van der Sluijs, H. Van Dyck, and M. Wiemers.  
790 2015. Effects of neonicotinoids and fipronil on non-target invertebrates. Environmental  
791 Science and Pollution Research 22:68–102.
- 792 Porlier, M., M. Bélisle, and D. Garant. 2009. Non-random distribution of individual genetic  
793 diversity along an environmental gradient. Philosophical Transactions of the Royal Society  
794 B: Biological Sciences 364:1543–1554.
- 795 Poulin, B., G. Lefebvre, and L. Paz. 2010. Red flag for green spray: adverse trophic effects of Bti  
796 on breeding birds. Journal of Applied Ecology 47:884–889.
- 797 QGIS. 2020. QGIS Geographic Information System. QGIS Association. <http://www.qgis.org>.
- 798 R Core Team. 2019. R: A language and environment for statistical computing.
- 799 Rahmstorf, S., and D. Coumou. 2011. Increase of extreme events in a warming world.  
800 Proceedings of the National Academy of Sciences 108:17905–17909.
- 801 Rappole, J. H., and A. R. Tipton. 1991. New harness design for attachment of radio transmitters  
802 to small passerines. Journal of field ornithology 62:335–337.
- 803 Raven, P. H., and D. L. Wagner. 2021. Agricultural intensification and climate change are  
804 rapidly decreasing insect biodiversity. Proceedings of the National Academy of Sciences

- 805 118:e2002548117.
- 806 Rendell, W. B., and R. J. Robertson. 1990. Influence of Forest Edge on Nest-Site Selection by  
807 Tree Swallows. *Wilson Journal of Ornithology* 102:634–644.
- 808 Reznick, D., L. Nunney, and A. Tessier. 2000. Big houses, big cars, superfleas and the costs of  
809 reproduction. *Trends in Ecology & Evolution* 15:421–425.
- 810 Rioux Paquette, S., D. Garant, F. Pelletier, and M. Bélisle. 2013. Seasonal patterns in Tree  
811 Swallow prey (Diptera) abundance are affected by agricultural intensification. *Ecological*  
812 *Applications* 23:122–133.
- 813 Rose, A. P. 2009. Temporal and Individual Variation in Offspring Provisioning by Tree  
814 Swallows: A New Method of Automated Nest Attendance Monitoring. *PLoS ONE* 4:e4111.
- 815 Rosenberg, K. V., A. M. Dokter, P. J. Blancher, J. R. Sauer, A. C. Smith, P. A. Smith, J. C.  
816 Stanton, A. Panjabi, L. Helft, M. Parr, and P. P. Marra. 2019. Decline of the North  
817 American avifauna. *Science* 366:120–124.
- 818 Rubolini, D., A. Massi, and F. Spina. 2002. Replacement of body feathers is associated with low  
819 pre-migratory energy stores in a long-distance migratory bird, the barn swallow (*Hirundo*  
820 *rustica*). *Journal of Zoology* 258:S0952836902001590.
- 821 Ruiz, J., and G. Domon. 2009. Analysis of landscape pattern change trajectories within areas of  
822 intensive agricultural use: case study in a watershed of southern Québec, Canada.  
823 *Landscape Ecology* 24:419–432.
- 824 Sæther, B.-E., and O. Bakke. 2000. Avian Life History Variation and Contribution of  
825 Demographic Traits to the Population Growth Rate. *Ecology* 81:642.
- 826 Schifferli, L., M. U. Grüebler, H. A. J. Meijer, G. H. Visser, and B. Naef-Daenzer. 2014. Barn  
827 Swallow *Hirundo rustica* parents work harder when foraging conditions are good. *Ibis*  
828 156:777–787.
- 829 Shipley, J. R., C. W. Twining, C. C. Taff, M. N. Vitousek, A. Flack, and D. W. Winkler. 2020.  
830 Birds advancing lay dates with warming springs face greater risk of chick mortality.  
831 *Proceedings of the National Academy of Sciences* 117:25590–25594.
- 832 Sigouin, A. 2020. Effets Combinés De L'exposition Aux Pesticides Et À Des Ectoparasites  
833 Hématophages Sur La Physiologie Des Oisillons De L'hirondelle Bicolore. Université de  
834 Sherbrooke.
- 835 Smits, J. E. G., G. R. Bortolotti, M. Sebastian, and J. J. H. Ciborowski. 2005. Spatial, temporal,  
836 and dietary determinants of organic contaminants in nestling tree swallows in point Pelee  
837 national park, Ontario, Canada. *Environmental Toxicology and Chemistry* 24:3159.

- 838 Spiller, K. J., and R. Dettmers. 2019. Evidence for multiple drivers of aerial insectivore declines  
839 in North America. *The Condor* 121:1–13.
- 840 Staggenborg, J., H. M. Schaefer, C. Stange, B. Naef-Daenzer, and M. U. Gruebler. 2017. Time  
841 and travelling costs during chick-rearing in relation to habitat quality in Little Owls *Athene*  
842 *noctua*. *Ibis* 159:519–531.
- 843 Stanton, R., R. G. Clark, and C. A. Morrissey. 2017. Intensive agriculture and insect prey  
844 availability influence oxidative status and return rates of an aerial insectivore. *Ecosphere*  
845 8:e01746.
- 846 Stanton, R., C. A. Morrissey, and R. G. Clark. 2016. Tree Swallow (*Tachycineta bicolor*)  
847 foraging responses to agricultural land use and abundance of insect prey. *Canadian Journal*  
848 *of Zoology* 94:637–642.
- 849 Stanton, R., C. A. Morrissey, and R. G. Clark. 2018. Analysis of trends and agricultural drivers  
850 of farmland bird declines in North America: A review. *Agriculture, Ecosystems &*  
851 *Environment* 254:244–254.
- 852 Stearns, S. C. 1992. *The evolution of life histories*. Oxford University Press.
- 853 Stephens, D. W., J. S. Brown, and R. C. Ydenberg. 2008. *Foraging: behavior and ecology*.  
854 University of Chicago Press.
- 855 Tapper, S., J. J. Nocera, and G. Burness. 2020. Experimental evidence that hyperthermia limits  
856 offspring provisioning in a temperate- breeding bird. *Royal Society Open Science* 7.
- 857 Taylor, L. R. 1963. Analysis of the Effect of Temperature on Insects in Flight. *The Journal of*  
858 *Animal Ecology* 32:99.
- 859 Templ, M., K. Hron, and P. Filzmoser. 2011. robCompositions: An R-package for Robust  
860 Statistical Analysis of Compositional Data. Pages 341–355 *Compositional Data Analysis*.  
861 John Wiley & Sons, Ltd.
- 862 Tews, J., D. G. Bert, and P. Mineau. 2013. Estimated Mortality of Selected Migratory Bird  
863 Species from Mowing and Other Mechanical Operations in Canadian Agriculture. *Avian*  
864 *Conservation and Ecology* 8:art8.
- 865 Tremblay, I., D. W. Thomas, J. Blondel, P. Perret, and M. M. Lambrechts. 2004. The effect of  
866 habitat quality on foraging patterns, provisioning rate and nestling growth in Corsican Blue  
867 Tits *Parus caeruleus*. *Ibis* 147:17–24.
- 868 Tschardtke, T., A. M. Klein, A. Krüess, I. Steffan-Dewenter, and C. Thies. 2005. Landscape  
869 perspectives on agricultural intensification and biodiversity - ecosystem service  
870 management. *Ecology Letters* 8:857–874.

- 871 Twining, C. W., J. R. Shipley, and D. W. Winkler. 2018. Aquatic insects rich in omega-3 fatty  
872 acids drive breeding success in a widespread bird. *Ecology Letters* 21:1812–1820.
- 873 Wagner, D. L., E. M. Grames, M. L. Forister, M. R. Berenbaum, and D. Stopak. 2021. Insect  
874 decline in the Anthropocene: Death by a thousand cuts. *Proceedings of the National*  
875 *Academy of Sciences* 118:e2023989118.
- 876 Wiersma, P. 2005. Metabolic adjustments to increasing foraging costs of starlings in a closed  
877 economy. *Journal of Experimental Biology* 208:4099–4108.
- 878 Winkler, D. W., K. K. Hallinger, D. R. Ardia, R. J. Robertson, B. J. M. Stutchbury, and R. R.  
879 Cohen. 2020. Tree Swallow (*Tachycineta bicolor*). Page in A. F. Poole, editor. *Birds of the*  
880 *World*. Cornell Lab of Ornithology.
- 881 Wood, S. N. 2017. *Generalized additive models: an introduction with R*. CRC press.
- 882 Wuebbles, D. J., K. Kunkel, M. Wehner, and Z. Zobel. 2014. Severe Weather in United States  
883 Under a Changing Climate. *Eos, Transactions American Geophysical Union* 95:149–150.
- 884 Yap, K. N., O. R. Kim, K. C. Harris, and T. D. Williams. 2017. Physiological effects of  
885 increased foraging effort in a small passerine. *The Journal of Experimental Biology*  
886 220:4282–4291.
- 887 Zuur, A. F., E. N. Ieno, N. Walker, A. A. Saveliev, and G. M. Smith. 2009. *Mixed effects models*  
888 *and extensions in ecology with R*. Page Smart Society. Springer New York.
- 889
