Title - Negative effects of agricultural intensification on energetic gain rates of a declining aerial insectivore

List of Authors - Daniel R. Garrett<sup>1,2</sup>, Fanie Pelletier<sup>1</sup>, Dany Garant<sup>1</sup>, and Marc Bélisle<sup>1</sup>

<sup>1</sup>Département de biologie, Université de Sherbrooke, 2500 Boulevard de l'Université, Sherbrooke, Québec J1K2R1 Canada

<sup>2</sup>[daniel.garrett@usherbrooke.ca](mailto:daniel.garrett@usherbrooke.ca)

# Abstract

The historical rise of intensive agricultural practices is hypothesized to be related to declines of grassland and aerial insectivorous birds. Drivers of declines may also influence the overall abundance and spatial distribution of insects within agricultural landscapes. Subsequently, average energetic gain rates of birds breeding within more agro-intensive landscapes may be impacted. Lower energetic gain rates in agro-intensive landscapes may lead to reduced growth rate, body condition or fledging success of nestlings but also to diminished body condition of food provisioning adults. In this study, we assessed if energetic gain of nestlings and food provisioning behavior of adults varied across a gradient of agricultural intensification in a declining aerial insectivore, the Tree swallow (*Tachycineta bicolor*). We found that hourly gain rate was lower in agro-intensive landscapes, and yet travel distances were longest within less agro-intensive landscapes. Our results highlight that, in order to maximize long term average gain rates, Tree swallows breeding within agro-intensive landscapes must forage with greater intensity, perhaps at a cost to themselves, or else costs will transfer to growing broods. Our work provides further evidence that agricultural intensification on the breeding grounds can contribute to the declines of aerial insectivores in part through a trophic pathway.

Key words: aerial insectivores; agricultural intensification; breeding costs; central-place foraging; Diptera; marginal value theorem; PinPoint GPS; resource availability; *Tachycineta bicolor*; Tree swallows.

# **Introduction**

Populations of both grassland and farmland birds have severely declined since the 1970s (Stanton et al. 2018, Rosenberg et al. 2019, Bowler et al. 2019). These groups include many aerial insectivores, a foraging guild presenting steeper population declines than most other avian guilds (Nebel et al. 2010, Michel et al. 2016). Concurrent changes in landscape composition and avian population indices have led to the hypothesis that these declines are driven, at least partly, by the increasing use of intensive agricultural practices (Benton et al. 2003, Hallmann et al. 2014, Stanton et al. 2018, Spiller and Dettmers 2019). Indeed, intensive agricultural practices increasing agricultural yield per unit area of cultivated land, such as row cropping and the use of both synthetic fertilizers and pesticides, have risen dramatically in the past decades (Tscharntke et al. 2005, DiBartolomeis et al. 2019, Malaj et al. 2020).

Although many aerial insectivores share a common foraging strategy and diet, the ecological diversity of this guild invalidates many of the hypothesized drivers of farmland bird declines (Stanton et al. 2018, Spiller and Dettmers 2019). For instance, increased mechanization, including the frequency of forage harvesting, results in the significant nest destruction of ground nesting farmland birds (Tews et al. 2013, Stanton et al. 2018). Yet, most aerial insectivores do not nest on the ground and thus many hypothesized mechanisms underlying their declines involve a trophic pathway. One of those mechanisms postulates that intensive agricultural practices have reduced the overall abundance and changed the species composition or nutritive value of their prey (Stanton et al. 2018, Twining et al. 2018, Spiller and Dettmers 2019). Many factors of agricultural intensification can indeed affect the abundance, species assemblages, distributions, and trophic interactions of insects (Raven and Wagner 2021, Wagner et al. 2021).

Therefore, intensive agricultural practices have the potential to affect the fitness of insectivorous birds through food limitation.

Previous studies have indeed observed that agricultural intensification, including habitats impactful to insect communities and abundances, correlate with changes in dietary composition (Nocera et al. 2012, English et al. 2017, Bellavance et al. 2018), reductions in annual fitness proxies (Benton et al. 2002, Ghilain and Bélisle 2008, Garrett et al. 2021), and altered population growth (Stanton et al. 2018) of several aerial insectivore species. Studies linking prey availability to aerial insectivore breeding success have, however, often failed to observe such relationships (Dawson and Bortolotti 2000, Dunn et al. 2011, Imlay et al. 2017, McClenaghan et al. 2019). A lack of association between food availability and fitness proxies is potentially explained by breeding individuals compensating for reduced food availability or quality by altering foraging effort (Stephens et al. 2008). For altricial birds, food-provisioning is considered one of the most costly behaviors as individuals must meet the increasing metabolic demands of their brood while foraging for themselves (Drent and Daan 1980, Wiersma 2005, Schifferli et al. 2014). Moreover, aerial insectivores are mostly short-lived species and thus life history theory suggests impediments to breeding will have significant impacts on lifetime reproductive success (Stearns 1992, Sæther and Bakke 2000, Berzins et al. 2020). Therefore, if compensation of reduced prey availability is through increased foraging effort, then it potentially comes at a cost to an individual's own survival and future reproduction (Stearns 1992, Reznick et al. 2000, Harrison et al. 2011).

The large-scale homogenization of landscapes resulting from agricultural intensification (Benton et al. 2003) may thus alter foraging behavior and exacerbate the stress experienced by food-

provisioning adults (Hinsley 2000). Assuming food-provisioning birds are maximizing their average long-term rate of energy gain (Charnov 1976, Stephens et al. 2008), and if food patches are indeed of lower quality and/or more sparsely distributed within intensively cultivated landscapes, then central-place foraging theory predicts lower gain and nest visitation rates within these landscapes (Orians and Pearson 1979, Olsson et al. 2008). Therefore, parents may optimize foraging strategies, potentially by increasing foraging efforts, to compensate for lowered gain rates and to overcome the consequences of nesting within such agro-intensive landscapes (Olsson et al. 2008). Empirical evidence for such elevated foraging workloads includes foraging at greater distances, lower nest visitation rates, and reduced nest attendance in landscapes dominated by agriculture (Bruun and Smith 2003, Poulin et al. 2010, Catry et al. 2014, Stanton et al. 2016, Staggenborg et al. 2017, Evens et al. 2018). Furthermore, birds whose central places are located within more intensely cultivated landscapes present several conditions potentially related to increased foraging costs (Evens et al. 2018), including greater oxidative stress (Stanton et al. 2017, Evens et al. 2018) and lower immunocompetency (Belant et al. 2000, Pigeon et al. 2013). It is therefore imperative to assess the influence of landscape context on the capacity of breeding individuals to compensate for poor foraging conditions and the resultant workload.

A recent 11-year study observed that, upon controlling for local prey availability, several indices of breeding success in Tree swallow (*Tachycineta bicolor*) remained associated with an agricultural gradient in southern Québec, Canada (Garrett et al. 2021). Breeding attempts within landscapes dominated by intensively managed row crops resulted in reduced fledging success, longer nestling periods and shorter fledging wing lengths (Garrett et al. 2021). If agro-intensive habitats do indeed reduce the functional connectivity of landscapes by reducing the amount and distribution of suitable foraging patches, then central-place foragers in these landscapes

potentially expend more time or energy traveling between food patches and exploiting them, with the additional cost of settling for patches of lower quality (Hinsley 2000, Bélisle 2005, Evens et al. 2018). Therefore, one hypothesized mechanism explaining the results of Garrett et al. (2021) is that swallows breeding in agro-intensive landscapes provide food at lower rates and thus nestlings experience lower energetic gain rates.

Presented here are the results of a study evaluating the strength of evidence for this hypothesis. Our principal goals were to evaluate how a gradient of agricultural intensification influenced the provisioning rate by adults, the energetic gain rates of nestlings, and travel distances of food provisioning parents. Specifically, we evaluated a series of hypotheses grounded in central-place foraging theory (Stephens et al. 2008, Olsson et al. 2008). We firstly assumed the duration of each foraging bout is composed of the travel to, between, and within foraging patches, and that the biomass of food collected while exploiting a patch increases, yet at a decreasing rate with patch residency time (Olsson et al. 2008). We further assumed food bolus biomass is positively related to its energy content, that traveling and foraging costs increase linearly with time, and that nestling rearing females are attempting to maximize their average long-term net rate of energy gains per unit time (Charnov 1976, Stephens et al. 2008). Therefore, females whose nests are within landscapes composed of more dispersed or poorer foraging patches, as expected in landscapes dominated by agro-intensive cultures, will experience longer travel times (Figure 1A and C) or lower instantaneous gain rates while exploiting patches (Figure 1B and C) and thereby show lower food delivery rates. Finally, shorter travel times can counterbalance slower gain rates within food patches, resulting in different food provisioning rates and yet similar energetic gain rates between contrasting landscapes (Figure 1D). In addition, we tested the prediction that foraging distances would be furthest within more agro-intensive landscapes, indicating greater

travel time and costs in such landscapes. We also tested the expectation that these effects would be at least partly alleviated with increasing local prey availability (i.e. prey availability close to the nest), but exacerbated by increasing food-demand from the brood (e.g. larger and older broods; Geary et al. 2020).

## Methods

### Study sites and nest box visits

Data were collected between 2011 and 2016 within a nest box system placed across 40 farms throughout a gradient of agricultural intensification in southern Québec, Canada (Figure 2, but see Ghilain and Bélisle 2008 for details). The western portion of the study area is composed primarily of large-scale row cropping, resulting in expanses denuded of forest cover and dominated by corn and soybean monocultures, and to a lesser extent, other cereals (principally wheat) (Bélanger and Grenier 2002, Ruiz and Domon 2009). This focus on monocultures has led to the near ubiquitous use of fertilizers, herbicides, insecticides and fungicides, as well as increased mechanization and removal of both surface waters and wetlands in this region (Jobin et al. 1996). These agro-intensive landscapes transition to ones composed primarily of pastures and forage crops (e.g. hay, alfalfa and clover) in the eastern parts of the study system and are interspersed within large areas of forest cover and a systematic drop in pesticide detections (Sigouin 2020).

Ten nest boxes were placed on the field margins of each farm (total N=400) and have been monitored every two days throughout each Tree swallow breeding season since 2006 (Porlier et al. 2009). The number of eggs and nestlings were counted during each nest box visit, and thus the age and phenology of each brood is known within two days of accuracy. We captured > 99%

of adult females (during incubation) and 80% of males (during the brooding period) of each breeding attempt. Adults were banded with an aluminum US Geological Survey band containing a unique identification code and a series of morpho-metrics and samples were collected (Ghilain and Bélisle 2008, Lessard et al. 2014).

## Food provisioning

Food provisioning was characterized via two rates defining hourly energetic gains of growing broods: the total biomass of delivered food boluses per hour (bolus biomass; mg/hr) and the number of food boluses delivered per hour (bolus delivery). These rates were estimated during food-provisioning sessions conducted between 2011 and 2016. Sessions consisted of two consecutive 30-min blocks in which collars were applied to each nestling within broods aged 6, 8, 10, and 12 days old (Bellavance et al. 2018). Collars were composed of a rubber band slid through a 5-mm long feeding tube and adjusted like a bolo-tie to capture food boluses in the crop yet loose enough to not restrict respiration. This method has often been used to document the diet of Tree swallows, and has not been found to impact nestling survival (McCarty and Winkler 1999, Johnson and Lombardo 2000, Smits et al. 2005, Bellavance et al. 2018). At the end of each block, boluses were carefully removed via forceps and the nest was checked for discarded boluses. Boluses were then placed in sterile 50-ml conical tubes and immediately placed in a portable freezer (< 12 hours) until being stored at -80°C. At the end of each session, collars were removed and the starting time, the Julian date and the presence of precipitation was recorded. The maximum temperature during sessions was also noted at the end of each breeding season via iButtons (model DS1922L; Embedded Data Systems, Lawrenceburg, Kentucky, USA) attached to the underside of a single nest box on each farm that recorded hourly temperatures.



In a tandem study occurring between 2013 and 2016, the food boluses collected during food provisioning sessions were analyzed for the presence of the principal active agents of many pesticides (Haroune et al. 2015). The methods of this study required recording the wet mass of food boluses ( $\pm 1$  mg). We subsequently used this measure to estimate the total biomass of food boluses delivered during the one-hour food provisioning sessions.

## Foraging distance

We used GPS locations of nestling rearing females (nestling age 4-12 days) to estimate their total hourly distance traveled (DT) and mean hourly distance from their nest box (DNB). These metrics were assumed to be indicative of the amount of travel undergone by each individual and therefore to reflect the amount of energy expended while food provisioning. We used hourly travel distances to have a comparable time scale to the hourly rates estimated by the food-provisioning sessions. Specifically, we fitted PinPoint-10 GPS tags (Lotek Wireless Inc, Newmarket, Ontario, Canada) to 43 nestling rearing females across 14 farms in 2019 (Figure 2, white points). Chosen farms represented landscapes dominated by either forage and pasture fields or the principal row-crop monocultures of our study system (i.e. corn, soybean and other cereals), with minimal tree cover. Tags weighed between 0.9 g and 1.2 g, including the harness (Figure S1), and were fitted over the synsacrum using leg loops (Rappole and Tipton 1991). We preprogrammed tags so GPS fixes (“SWIFT” fixes, nominal horizontal accuracy  $\pm 10$  m) were taken every 15 min between 5:00 and 20:00 local time (N = 60 locations) the day after deployment, allowing for a habituation period. This schedule was the most intensive that we could use to cover the majority of the daily food provisioning period given the battery-life (McCarty 2002, Rose 2009). The day after data collection, individuals were caught, and their tag removed. Once data were extracted, movements of each individual were derived by connecting

GPS locations, in chronological order, and then calculating the distance along each segment of the resulting path using both the *sp* (Bivand et al. 2013) and *rgeos* (Bivand and Rundel 2019) packages in the R interface (R Core Team 2019). We estimated DT by summing the length of each segment within each one-hour sampling period. We then estimated DNB by grouping points within each one-hour block and then calculating the mean distance between each point and the female's nest box.

## Landscape characterization

Landscape characterization started with delineating habitats, including agricultural parcels, within 500 m of each nest box using orthophotos (scale 1:40 000) in QGIS (QGIS 2020) at the end of each breeding season between 2011 to 2019. This spatial scale hosts close to 80% of nestling rearing females' daily time budget. We then characterized each habitat parcel in situ, defining agricultural habitats by the cultures grown. We then reclassified habitats into one of four higher order categories represented by forest, corn and soybean, forage fields (including pastures as well as hay, alfalfa, and clover fields), and cereals (e.g. wheat, oat, barley). Higher order categories represent the hypothesized habitats Tree swallows use as indicators during nest-site selection, and the principal habitats composing landscapes throughout this system (Rendell and Robertson 1990, Courtois 2020, Winkler et al. 2020).

We calculated the mean percent cover of each higher order category across all nest boxes on each farm for each breeding season, resulting in 240 separate landscape contexts (i.e., 40 farms x 6 years). To obtain an integrative measure of the percent cover of all higher order habitats, defined as the landscape context, we used a robust principal components analysis (PCA) for compositional data (Filzmoser et al. 2009) to assign "site scores" to each of the farms during each year. Site scores were defined by the values along the first two components of the resulting

compositional PCA as fitted using the robCompositions package in R (Templ et al. 2011). The first component (Comp.1) explained 79.8% of the variance in landscape context and was correlated positively with corn and soybean cultures and negatively with both forest cover and forage fields (Figure 3A). The second component (Comp.2) explained 16.3% of the variance and was positively correlated with forest cover, negatively with both forage and cereal covers. Site scores were assigned to each food-provisioning session throughout the study.

The study of foraging distance occurred separately and on a subset of farms than those used to estimate food provisioning (Figure 2). We thus repeated the landscape characterization used in the food-provisioning study, yet for the subset of farms hosting the foraging distance study. The resulting PCA was similar to that of the food provisioning sessions. The first component explained 87.4% of the variance in landscape context and correlated positively with both corn and soybean cultures, and negatively with both forest and forage cover (Figure 3B). The second component explained 12.1% of the variance and correlated positively with forest cover as well as with both corn and soybean cultures, and negatively with forage and cereal cultures.

For ease of interpretation, all statistical predictions and interpretations were made in reference to five landscape context scenarios. These scenarios represent the predominant types of landscape contexts experienced across the agricultural gradient and are defined by the site scores of five farms (1-5) identified in Figure 3A and B. The scenarios for the food-provisioning sessions are: (1) ones dominated by corn or soybean with 8.8% forest cover (corn/soybean with forest); (2) ones denuded of forest cover and dominated by only corn or soybean (corn/soybean); (3) ones denuded of forest cover and dominated by a mixture of corn, soybean and cereals (mixed row crops); (4) ones with 9.0% forest cover and dominated by forage crops (forage); and (5) landscapes with 69.0% forest cover and few cultivated parcels typically devoted to forage crops

(agro-forested). Although site score values differ between the PCA derived for the food-provisioning and foraging distance studies, they are qualitatively similar and the above landscape context scenarios apply to both.

The distance of GPS locations from their respective nest boxes, greater than 0.5 km from nest boxes (19.3% of locations), was positively related to the percent cover of water bodies (e.g. rivers, wetlands and ponds) around a point (Figure S2), supporting the contention that these features are important (Elgin et al. 2020, Berzins et al. 2020). These habitats are however rare within our system and were considered as potential confounding factors of the observed foraging responses. Moreover, we hypothesized that the influence of water features located far from a nest may depend on their local availability (i.e. close to the nest). We therefore undertook a modeling endeavor aimed at identifying the spatial extent and the type of water features most influential to the rate of food provisioning (Appendix S1, Figure S3).

Due to several model convergence problems, we found numerical stability was greatest when treating water features as the non-overlapping cover of wetlands and open bodies of water (hitherto referred to as surface water). A local minimum of delta AICc was observed when including the percent cover of surface water calculated within 1 km (local percent cover) and 10 km (regional percent cover) from the nest. These model terms were included in all models for all foraging proxy. Surface water data were derived from vector layers acquired from the Canadian National Hydro Network data sets (NHN 2020) and Ducks unlimited (Ducks Unlimited, 2020). All calculations of percent cover were made using the sf (Pebesma 2018) R package.

## Local prey availability

Local prey availability was represented by the dry biomass of Diptera found within insect samples from two separate insect traps placed on each of the 40 farms between 2006 and 2016. We focused on dry biomass of Diptera (using the number of Diptera provides qualitatively similar results, analyses not shown, see also Rioux Paquette et al. 2013, Garrett et al 2021) because they represent a majority of the insects found in the diets of nestling Tree swallows (McCarty and Winkler 1999, Johnson and Lombardo 2000, Mengelkoch et al. 2004, Twining et al. 2018). Within our study system, 67% of the insects found in food boluses delivered to nestlings are Diptera (Rioux Paquette et al. 2013, Bellavance et al. 2018). The focus of this work being on the availability of food during the nestling period, we processed insect samples collected between 1 June and 15 July, representing the nestling period of over 96% of first breeding attempts. Diptera within each insect sample were removed, counted, and then placed in an oven at 50°C for over 24 hours to ensure no further changes in mass. Sample dry mass was then recorded ( $\pm 0.0001$  g) without delay.

To obtain prey estimates more reflective of the farm vs. local scale of each trap, and avoid punctuated events as insect swarms, we chose to use daily model predictions of Diptera biomass from generalized additive models (GAMs) in which raw values were regressed against the Julian date of sample collection for each farm and year. GAMs were fitted as a tensor product smoother using the mgcv package in R (Wood 2017) with an identical degree of smoothness ( $k=10$ ). Model predictions are the accumulated biomass of Diptera over a roughly 48-hour period occurring over a 3-day window (i.e. from the time the trap was reset on day one, the entirety of day 2, and until the content of the trap was collected on day 3). As we wanted estimates of

Diptera biomass on the day of the food provisioning session, prey availability is represented by the predicted Diptera biomass on the day following the food provisioning session.

## Statistical methods

### *Food provisioning*

Bolus biomass was a continuous right-skewed (conditional) response containing zeros and was consequently modeled with GLMMs using a tweedie distribution and a log link function (Lo and Andrews 2015). It was noted that the likelihood to encounter food provisioning sessions with zero delivered boluses varied with year, thus bolus delivery followed a (conditional) zero-inflated Poisson distribution, including a year-varying zero-inflation factor, and was modeled with generalized linear mixed effect models (GLMMs) with a log link (Blasco-Moreno et al. 2019). In order to account for differences in sampling effort (both 30-min blocks were completed in 86% of sessions), we included whether sessions lasted half or an entire hour as an offset (i.e.  $\log(0.5)$  or  $\log(1)$ , respectively) in both sets of analyses. We further included year, farm, and brood IDs as random factors in order to account for the data's hierarchical structure (i.e. broods nested within farms nested within years).

We took an information theoretic and multimodel approach to evaluate links between landscape context and rates of food provisioning by comparing a set of 12 models representing biologically relevant alternative hypotheses (Table 1 and Table S1). Except for a Null model containing only random effects, we started with a Base model including potential confounding variables. This model contained two weather variables. First, the mean maximum temperature, as insects require a threshold temperature before being active (Taylor 1963, Gruebler et al. 2008), and the upper limit of foraging swallow behavior is potentially thermally constrained (Tapper et al. 2020).

Second, the presence of precipitation, as we expected precipitation to act as a hindrance to foraging (Cox et al. 2019), and because food provisioning sessions did not last long enough to estimate amount of precipitation. The base model also included the age of the female (second year (SY) or after second year (ASY); Hussell 1983), time at the start of the provisioning session as a second-order polynomial, the percent cover of surface water within 1 km and 10 km and their interaction (Elgin et al. 2020), and a proxy of the brood's food demand (Geary et al. 2020). This brood demand proxy was represented by the multiplication of the brood size with the brood age. We did not expect foraging rates to respond linearly with this proxy, as the functional response likely reaches a plateau whereby food provisioning parents can no longer increase their efforts. We therefore treated this variable as a third-order polynomial. All model terms within Base were included in all subsequent models of the candidate set. Our principal model of interest was one in which sites scores and their interaction were added to assess landscape context effects (Base + Land). Because potential negative effects of foraging within agro-intensive landscapes may be alleviated with increasing prey availability closer to nests, we also considered models with only local prey availability (Base + Food), one with both prey availability and site scores (Base + Food + Land), and one also including the interaction between prey availability and Comp.1 (Base + Food\*Land). We further hypothesized provisioning rates may be influenced by brood demand and the availability of prime foraging habitat and included four models with such relationships. These included one in which the effect of land cover and local prey availability varied with the demand proxy (Base + Food + Land \* Demand and Base + Land + Food \* Demand) or the local (1 km) percent cover of surface water (Base + Land + Food \* LSW and Base + Food + Land \* LSW).

### *Foraging distance*

The two response variables characterizing the foraging distances of females were the total hourly distance traveled (DT) and the mean hourly distance an individual was from its nest box (DNB). These response variables were modeled using linear mixed effects models (LMM). Both response variables were log-transformed to ensure normality of residuals. We included the individual and farm IDs as random effects to account for the hierarchical structure of the dataset (i.e. locations nested within individuals nested within farms).

We applied an information theoretic and multimodel approach to a set of six models to evaluate hypotheses about foraging distances (Table 1 and Table S1). We started with a Null model only including random effects and a Base model including potential confounding variables influential to foraging distances (McCarty 2002, Dreelin et al. 2018, Elgin et al. 2020). Confounding factors included the brood demand proxy as a third-order polynomial, as well as the percent cover of surface water within 1 km and 10 km and their interaction. We further included proxies of local prey availability, including the Julian date and the maximum observed temperature during each one-hour sampling period as a second-order polynomial (Rioux Paquette et al. 2013, Bellavance et al. 2018, Garrett et al. 2021). Though the principal model of interests was one including site scores and their interaction (Base + Land), we compared another three models hypothesizing that the effects of foraging within agro-intensive landscapes may either be alleviated or exacerbated by confounding variables. We thus considered models also including an interaction term between Comp.1 and each potential confounder, namely brood demand (Base + Land\*Demand), local (1 km) percent cover of surface water (Base + Land\*LSW), and local prey availability (Base + Land\*Food).



In all analyses, the effects of key individual variables, including interactions, were estimated via multi-model inference whereby predictions were calculated by model-averaging with shrinkage and shown with their 95% unconditional confidence intervals (Burnham and Anderson 2002). All quantitative covariates were z-transformed and all analyses were performed in R version 3.6.2 (R Core Team 2019) using the glmmTMB (Brooks et al. 2017) and AICcmodavg (Mazerolle 2020) packages. Model validation was performed following Zuur et al. (2009) using the DHARMA package (Hartig 2020)

## Results

### Food provisioning

#### *Bolus biomass*

We measured the total bolus biomass delivered during 741 food provisioning sessions from 420 broods, 92% of which consisted of both 30-min blocks. Overall mean bolus biomass was 284.5 mg per hour (SD = 344.9), ranging from 208.2 mg to 319.2 mg across years (Figure S4). The Null and Base models were not supported by the data, contrary to models including information on landscape context (Table S1). Compared to forage landscapes (#4 in Figure 4B), bolus biomass was 54.0% lower within agro-forested landscapes (#5), 42.8% lower in mixed row-crop landscapes (#3), and 32.8% lower within corn/soybean landscapes (#2). Unlike for bolus delivery rate (see below), we did not find that the effect of corn/soybean cover was dependent upon forest cover (#1). We further found bolus biomass increased almost linearly with brood demand (Table 2 and Figure S5), and negatively correlated with the local percent cover of surface water and was greater for ASY females (Table 2, Figure S5 and Figure S6). Lastly, bolus

biomass increased with both the start time and the maximum temperature of the food provisioning session, until plateauing at 14:12 and 25°C, respectively (Figure S5).

### *Bolus delivery*

We conducted 1,208 food provisioning sessions from 662 different broods. Overall mean bolus delivery was 2.00 boluses per hour (SD = 2.05), ranging from 1.69 to 2.25 across years (Figure S4). While the Null and Base models were not supported by the data, several alternative models received support (Table S1). We observed substantial landscape effects (Table 2, Figure 4A). Compared to forage landscapes (#4 in Figure 4A), bolus delivery rate was 39.6% lower within agro-forested landscapes (#5), 26.9% lower in mixed row-crop landscapes (#3), and 13.8% lower within corn/soybean landscapes (#2). The effect of corn/soybean cover was however highly dependent upon forest cover as the presence of remnant woodlots in landscapes highly dominated by these crops (#1) was associated with a bolus delivery rate 7.8% lower than within forage landscapes (#4). Although an increase of 18.4% in the mean bolus delivery rate was predicted across the full range of local prey availability, the effect size of this variable lacked precision (Table 2). We further found that bolus delivery rate was positively associated with brood demand (third-order) and both the start time and the maximum temperature of the food provisioning session, until plateauing at 14:23 and 25°C, respectively (Figure S7). It also negatively correlated with the local percent cover of surface water (Figure S8).

### *Foraging distance*

We successfully deployed and recovered 43 GPS tags. Of these tags, 40 successfully recorded all 60 attempted locations, resulting in 2,363 swift-fixes and 592 hourly estimates of foraging distances (Figure S9). The overall mean distance of each location from an individual's nest box

was 362 m (SD = 781) and 440 m (SD = 768) between each consecutive fix. Six females recorded locations over 5 km from their nest box with a maximum distance of 9.557 km.

### *Hourly distance traveled*

Overall mean DT was 1,841 m (SD=2,301, Figure S4). A single most predictive and parsimonious model occurred when considering landscape context along with an interaction between Comp.1 and local percent cover of surface water (Table 2 and Table S1). DT was longest within agro-forested landscapes (#5 in Figure 4C) and was 60.1% further when compared to forage landscapes (#4). Compared to forage landscapes, distances were 13.6% shorter within mixed row-crop landscapes (#3), and yet 49.4% shorter within corn/soybean landscapes (#2). The effect of corn/soybean cover was however highly dependent upon forest cover, as the presence of remnant woodlots in landscapes highly dominated by these crops (#1) was associated with a DT 27.0% shorter than within forage landscapes (#4). DT increased with brood demand until plateauing at mean demand values. DT was further associated in a quadratic fashion with both the Julian date and maximum temperature, peaking on Julian date 185 (4 July) and at 26.1°C (Figure S10 and Figure S11).

### *Hourly mean distance from nest box*

Overall mean DNB was 368 m (SD=563, Figure S4). While no single model could be considered the most predictive or parsimonious, models taking landscape context into account were clearly better supported (Table 2 and Table S1). DNB was furthest within agro-forested landscapes (#5 in Figure 4D) and was 49.3% further when compared to forage landscapes (#4). Compared to forage landscapes, DNB was 3.3% further within mixed row-crop landscapes (#3), and yet 39.3% closer within corn/soybean landscapes (#2). The effect of corn/soybean cover was however highly dependent upon forest cover as the presence of remnant woodlots in landscapes

highly dominated by these crops (#1) was associated with DNB being 23.9% closer than within forage landscapes (#4). DNB increased significantly until plateauing at mean values of brood demand. Lastly, DNB was associated in a quadratic fashion with both the Julian date and maximum temperature, peaking on Julian date 184 (3 July) and at 26.7°C (Figure S12 and Figure S13).

## Discussion

This study aimed to assess whether central-place foragers in agro-intensive landscapes expend more time or energy reaching food patches and traveling between them with the additional cost of settling for patches of lower quality, the combination of which resulting in lower food provisioning rates (Figure 1). We found that female Tree swallows provided food to their nestlings at lower rates within increasingly agro-intensive landscapes. The hourly rate of delivery of both bolus biomass and bolus number were indeed lowest within more agro-intensive landscapes and greatest within forage landscapes. Female Tree swallows traveled most and furthest from their nest within forest-dominated landscapes, and unexpectedly less and closer to their nest in agro-intensive compared to forage landscapes.

The relationship between the rate at which boluses were delivered and landscape context resembled that at which prey biomass was provided, suggesting that the biomass of individual boluses was similar throughout the agricultural intensification gradient studied (McCarty 2002). This outcome was corroborated by a supplemental analysis (Appendix S2, Table S2 and Table S3). Coupled with the result that females traveled furthest within predominantly forested landscapes and to a lesser extent forage landscapes, the relatively low variance in the biomass of individual boluses suggests that forage landscapes implied marginally greater travel times, yet more rapid loading curves, which subsequently led to greater gain rates than agro-intensive

landscapes (Figure 5). Lower gain rates within more agro-intensive landscapes may need to be compensated by parents elongating the entire foraging period of a given day, foraging more intensely when conditions allow, forgoing recuperation and foraging for themselves (Olsson et al. 2008, Schifferli et al. 2014). In all cases, increases in foraging effort may come at a cost to themselves through reduced body condition and thus potentially impactful to their future reproductive success (Stearns 1992, Reznick et al. 2000, Harrison et al. 2011, Lagrange 2015), as increases in effort may result in foraging parents being in too poor of body condition for molting prior to migration (Jenni-Eiermann and Jenni 1996, Rubolini et al. 2002). Furthermore, if parents cannot compensate for lowered gain rates, then broods may incur the cost through reduced growth rates or elevated mortality (Naef-Daenzer et al. 1999, Tremblay et al. 2004). In fact, evidence suggest food provisioning Tree swallows as well as their broods already incur these types of costs, as agro-intensive landscapes result in parents spending less time in the nest (Lamoureux 2010, Stanton et al. 2016), expressing reduced body condition (Pigeon et al. 2013, Stanton et al. 2017), and both reduced fledging success and nestling growth rates (Houle et al. 2020, Garrett et al. 2021). Some of these natal effects are of concern as they may be carried over into later life stages (Harrison et al. 2011).

One fundamental characteristic of our gradient of agricultural intensification, and as an extension, most agricultural landscapes, is a loss of forest cover (Fischer and Lindenmayer 2007). Within our study area, landscapes dominated by a mixture of forest cover and agricultural fields resulted in the lowest gain rates and furthest foraging distances. The foraging habitat of Tree swallows, as well as of most swallow species, is frequently recognized as being open terrestrial habitats or over large water surfaces (Evans et al. 2007, Boynton et al. 2020, Elgin et al. 2020). Thus, forest cover may reduce landscape functional connectivity for these species, at

least with respect to foraging (Bélisle 2005, Evens et al. 2018). In this way, as forest cover is reduced, the cover of foraging habitats, close to central places and conducive to Tree swallows, increases. In fact, second to forage landscapes, we found foraging rates were superior within agro-intensive landscapes with remnant forest cover. Residual woodlots within these agro-intensive landscapes add to the tree lines separating fields to increase the length of “forest” edges, where insect abundance tends to be greatest (Jokimäki et al. 1998, Evans et al. 2003, Boetzi et al. 2020). The fledging success of Tree swallows is greater in agro-intensive landscapes containing residual woodlots than ones denuded of forest cover (Garrett et al. 2021). It may therefore be hypothesized that the elevated insect abundance associated with these residual woodlots lead to greater gain rates and thus greater fledging success in this landscape context.

It should be noted that during the years covered by this study, areas intensively-managed for the growing of corn and soybean harbored elevated levels of pesticides in their surface waters, notably several herbicides (e.g. glyphosate, atrazine, S-metolachlor, imazethapyr) and neonicotinoid insecticides [e.g. clothianidin, thiacloprid, thiametoxam (Giroux 2019, Montiel-León et al. 2019)]. For instance, a previous study found that, on average, exposure to active pesticide agents within the food boluses was greatest within these landscapes (Sigouin 2020). The consumption or prolonged exposure to such chemicals can influence the neurological, endocrine and immunological systems of non-target animals, including vertebrates, via “skin” contact, breathing or consumption of food or water (Mayne et al. 2005, Mineau et al. 2013, Lopez-Antia et al. 2015, Pisa et al. 2015). Importantly, neurotoxic insecticides can induce anorexia, alter orientation and influence motor functions required for flight in birds (Eng et al. 2017, 2019). Foraging within agro-intensive landscapes increases exposure of foragers to these

chemicals, likely reducing their motivation and ability to forage, and thus potentially resulting in decreased provisioning rates.

Finally, foraging is a metabolically expensive behavior, made worse when foraging bouts are during the nestling periods (Bryant and Tatner 2008, Yap et al. 2017). Therefore, incoming food need not only be frequent, but also energetically rich (Twining et al. 2018). The diversity and abundance of insects found within food boluses suggests that the nutritive value of food varies across the agricultural gradient of our study system (Bellavance et al. 2018). Most notably, insects with aquatic life stages (principally Ephemeroptera) are more abundant within the food boluses retrieved from forage landscapes than from those dominated by more agro-intensive cultures. These insects are greater in highly unsaturated omega-3 fatty acids (HUFA; (Twining et al. 2018). Nestlings with diets rich in HUFA can grow faster, gain a better body condition and have greater immunocompetence, leading to elevated brood survival and fledging success (Twining et al. 2018). Such effect can logically be extended to foraging adults. Subsequently, the energetic losses of foraging may be more easily replenished within forage landscapes.

Global climate change results in increased global temperatures and predicts increases in both the frequency and intensity of extreme weather events, such as prolonged periods of low or high temperatures or precipitation (Rahmstorf and Coumou 2011, Wuebbles et al. 2014) . Such weather events may drastically alter the availability of insects as a food resource due to their thermally dependent nature (Grüebler et al. 2008, Shipley et al. 2020, Garrett et al. 2021). Furthermore, recent evidence suggests Tree swallows may already be foraging at some upper thermal threshold (Tapper et al. 2020). Our results, combined with other pieces of evidence, suggests food provisioning adults may also be foraging at some upper energetic limit inasmuch, as proxies of body condition suggest they are lower where gain rates are lower (Pigeon et al.

2013, Stanton et al. 2016, 2017). It is thus imperative that future work focuses not only on how agricultural practices or global climate change independently impact declining avian species, but also on how these factors may interact with one another. This importance is due to the ability of growing broods or breeding parents to manage extreme weather is potentially lower within more agro-intensive landscapes (Grue et al. 1997, Evans et al. 2003, Pérez et al. 2008, Eng et al. 2019, Tapper et al. 2020). Finally, our results provide evidence that aerial insectivore declines may be related to agricultural intensification through a trophic pathway.

## Acknowledgments

We are indebted to the farm owners who kindly accepted to partake in our long-term study since 2004. Sincere thanks to the many graduate students, field and lab assistants who helped collect, enter, and proof data throughout the years, notably with respect to insect sample processing. This work was conducted under the approval of the animal care committee of the Université de Sherbrooke and was financially supported by Natural Sciences and Engineering Research Council of Canada discovery grants to FP, DG and MB, two team research grants from the Fonds de recherche du Québec—Nature et technologies to FP, DG and MB, by the Canada Research Chairs program to FP and MB, as well as by the Canadian Foundation for Innovation to FP, DG and MB, the Canadian Wildlife Service of Environment and Climate Change Canada and the Université de Sherbrooke.



## 508 Tables and figures

509 **Table 1:** Mean  $\pm$  SD of covariates used to model response variables. Covariates for the  
 510 hourly number of boluses and total bolus biomass delivered to nestlings were representative of  
 511 the hourly food provisioning sessions conducted between 2011 and 2016. Covariates of foraging  
 512 distances were calculated for the hourly interval's representative of the hourly GPS locations.  
 513 Dashes imply the covariate was not used in the modeling of the response variable. Covariate  
 514 groups identify which covariates were present within models found in Table 1.

| Covariate                           | Acronym | Unit                      | Covariate group | Biomass             | Number              | Foraging distance |
|-------------------------------------|---------|---------------------------|-----------------|---------------------|---------------------|-------------------|
| Starting time                       | ST      | Time                      | Base            | 262.31 $\pm$ 150.16 | 251.57 $\pm$ 153.55 | -                 |
| Maximum temperature                 | TMAX    | °C                        | Base/Food       | 26.20 $\pm$ 4.08    | 25.54 $\pm$ 3.94    | 20.85 $\pm$ 5.08  |
| Brood demand proxy                  | DM      | Brood size *<br>Brood age | Base/Demand     | 40.50 $\pm$ 13.89   | 39.14 $\pm$ 12.8    | 29.48 $\pm$ 10.87 |
| Local surface water (1 km)          | LSW     | %                         | Base/ LSW       | 0.80 $\pm$ 1.43     | 0.87 $\pm$ 1.58     | 1.38 $\pm$ 1.68   |
| Regional surface water (10 km)      | RSW     | %                         | Base            | 1.58 $\pm$ 1.46     | 1.56 $\pm$ 1.42     | 2.62 $\pm$ 1.93   |
| Prey availability (Diptera biomass) | PA      | g                         | Food            | 0.02 $\pm$ 0.01     | 0.02 $\pm$ 0.01     | -                 |
| Site score Comp.1                   | Comp.1  | -                         | Land            | 0.34 $\pm$ 1.73     | 0.42 $\pm$ 1.72     | 0.07 $\pm$ 2.35   |
| Site score Comp.2                   | Comp.2  | -                         | Land            | -0.04 $\pm$ 0.88    | -0.01 $\pm$ 0.86    | -0.09 $\pm$ 1.38  |
| Julian day                          | JD      | days                      | Base            | -                   | -                   | 170.83 $\pm$ 7.04 |

515

**Table 2:** Standardized coefficient estimates and their 95% confidence intervals included in the top model of each response variable. See Table 1 for definitions of covariates and Table S1 for outcome of model selection. Coefficients in bold indicate confidence intervals not overlapping zero. Numbers next to acronym refer to the order of the polynomial term.

| Covariate        | Biomass                               | Delivery                              | Travel                                | Distance                              |
|------------------|---------------------------------------|---------------------------------------|---------------------------------------|---------------------------------------|
| Comp.1           | 0.03<br>(-0.01, 0.07)                 | 0.02<br>(-0.04, 0.07)                 | <b>-0.11</b><br><b>(-0.16, -0.06)</b> | <b>-0.08</b><br><b>(-0.15, -0.02)</b> |
| Comp.1:Comp.2    | <b>0.07</b><br><b>(0.02, 0.11)</b>    | <b>0.09</b><br><b>(0.02, 0.16)</b>    | <b>-0.13</b><br><b>(-0.19, -0.06)</b> | <b>-0.10</b><br><b>(-0.17, -0.03)</b> |
| Comp.2           | <b>-0.10</b><br><b>(-0.18, -0.01)</b> | <b>-0.15</b><br><b>(-0.27, -0.02)</b> | 0.07<br>(-0.02, 0.16)                 | 0.03<br>(-0.10, 0.15)                 |
| Female age (ASY) | 0.05<br>(-0.11, 0.21)                 | 0.13<br>(-0.13, 0.40)                 | -                                     | -                                     |
| Rain (Yes)       | -0.16<br>(-0.40, 0.07)                | -0.18<br>(-0.52, 0.16)                | -                                     | -                                     |
| DM1              | <b>4.04</b><br><b>(1.99, 6.10)</b>    | <b>9.78</b><br><b>(7.09, 12.47)</b>   | <b>3.11</b><br><b>(0.56, 5.66)</b>    | <b>4.09</b><br><b>(1.17, 7.01)</b>    |
| DM2              | <b>-5.21</b><br><b>(-7.29, -3.12)</b> | <b>-3.34</b><br><b>(-6.11, -0.57)</b> | -1.86<br>(-4.35, 0.64)                | <b>-4.23</b><br><b>(-6.99, -1.48)</b> |
| DM3              | <b>2.81</b><br><b>(0.89, 4.72)</b>    | 1.07<br>(-1.64, 3.78)                 | -0.01<br>(-2.78, 2.76)                | 0.17<br>(-2.94, 3.28)                 |
| ST1              | 2.08<br>(-0.03, 4.18)                 | 2.53<br>(-0.19, 5.26)                 | -                                     | -                                     |
| ST2              | <b>-2.33</b><br><b>(-4.43, -0.22)</b> | <b>-3.02</b><br><b>(-5.61, -0.43)</b> | -                                     | -                                     |
| TMAX1            | -0.23<br>(-2.43, 1.97)                | 0.13<br>(-2.58, 2.83)                 | <b>8.84</b><br><b>(6.43, 11.25)</b>   | <b>8.28</b><br><b>(5.67, 10.90)</b>   |
| TMAX2            | <b>-3.87</b><br><b>(-6.04, -1.69)</b> | <b>-3.99</b><br><b>(-6.75, -1.23)</b> | <b>-5.14</b><br><b>(-7.48, -2.80)</b> | <b>-4.46</b><br><b>(-7.02, -1.89)</b> |
| LSW              | <b>-0.08</b><br><b>(-0.14, -0.01)</b> | <b>-0.12</b><br><b>(-0.22, -0.02)</b> | 0.16<br>(-0.01, 0.33)                 | 0.05<br>(-0.15, 0.25)                 |
| LSW:RSW          | 0.04<br>(-0.05, 0.14)                 | 0.12<br>(-0.03, 0.28)                 | <b>-0.22</b><br><b>(-0.41, -0.03)</b> | -0.10<br>(-0.35, 0.14)                |
| RSW              | 0.06<br>(-0.01, 0.13)                 | 0.05<br>(-0.06, 0.16)                 | <b>-0.27</b><br><b>(-0.41, -0.13)</b> | <b>-0.23</b><br><b>(-0.43, -0.04)</b> |
| JD1              | -                                     | -                                     | <b>11.17</b><br><b>(8.04, 14.30)</b>  | <b>11.85</b><br><b>(8.14, 15.56)</b>  |
| JD2              | -                                     | -                                     | <b>-4.77</b><br><b>(-7.54, -1.99)</b> | <b>-5.20</b><br><b>(-8.43, -1.97)</b> |
| RSW:Comp.1       | -                                     | -                                     | <b>-0.07</b><br><b>(-0.13, -0.01)</b> | -                                     |

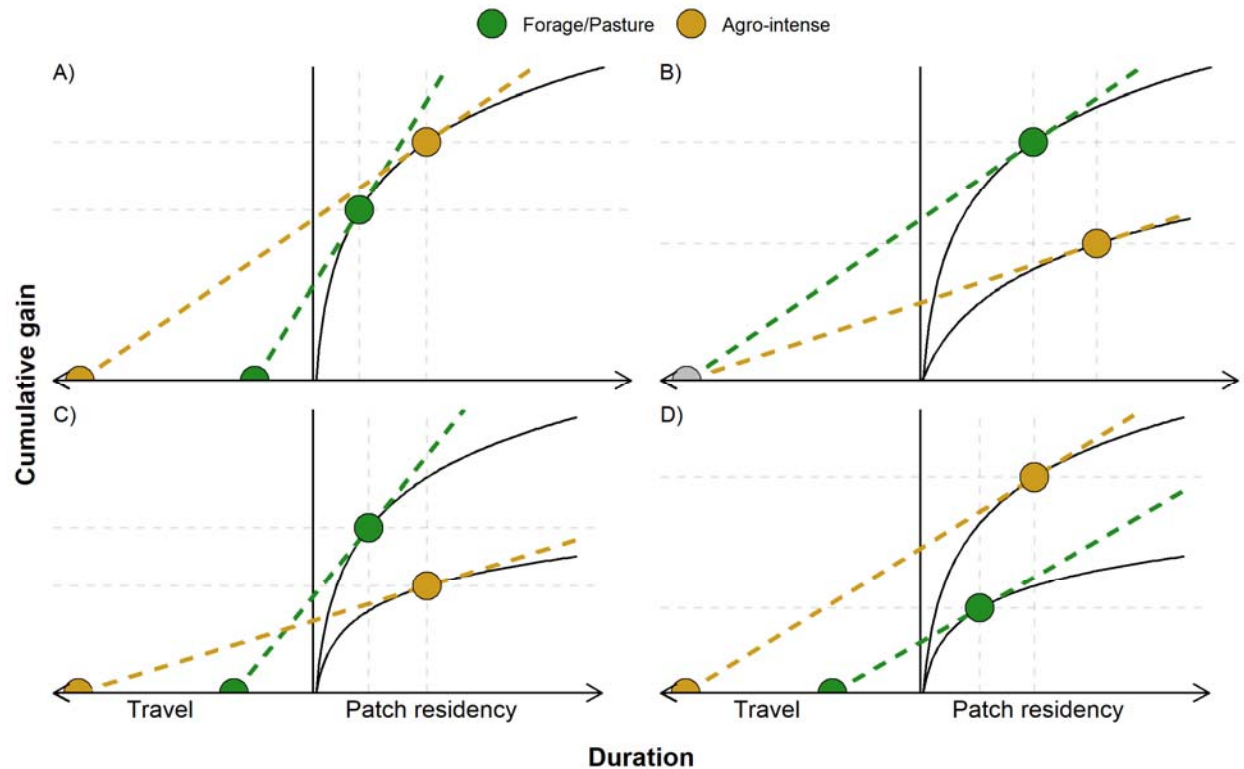

**Figure 1:** Optimal energetic gain rates expected under different scenarios where food provisioning individuals forage according to the marginal value theorem and experience different travel times and gain curves that depend (or not) on landscape context. The x-axis is the total duration of a foraging bout composed of both the travel time to foraging patches and the time spent foraging within patches. Relationship between cumulative gain and patch residency time is represented by a decelerating gain curve. The rate of energetic gains of a foraging bout is given by the ratio between the cumulative gain and the bout's total duration. Optimal gain rate is thus graphically represented by the slope of the dashed line connecting travel time to the tangent of the gain curve. Assuming more agro-intensive landscapes result in more dispersed or poorer foraging patches, landscape mediated differences in energetic gains potentially occur through longer travel times (A and C) or lower instantaneous gain rates while exploiting patches (B and

534 C). Lastly, shorter travel times can counterbalance slower gain rates within food patches,  
535 resulting in different food provisioning rates and yet similar energetic gain rates between  
536 contrasting landscapes (D).

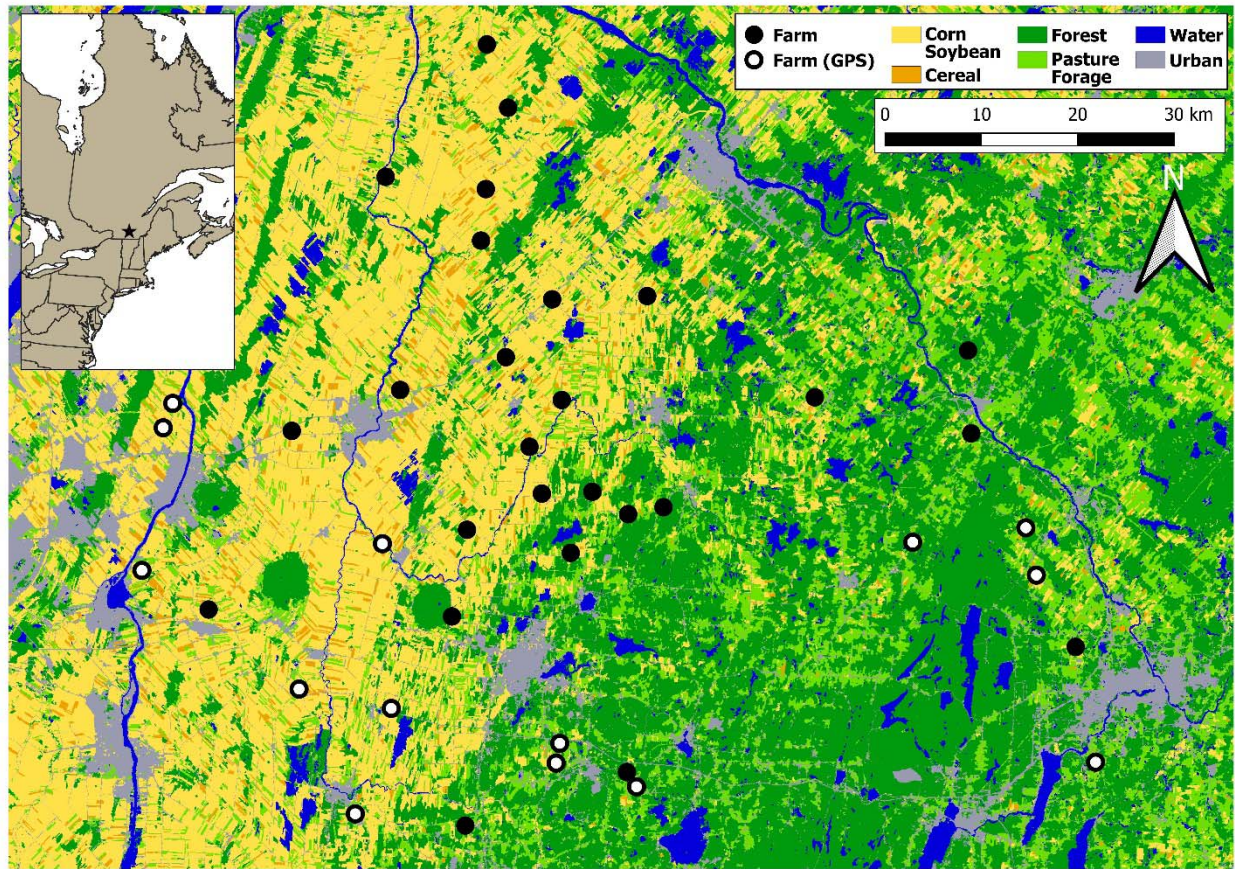

537

538 **Figure 2:** Map of study system. Each point represents the location of a farm, filled white  
539 points are farms where GPS were applied to 43 females. Underlying image represents the  
540 agricultural gradient derived from the Annual crop inventory (AAFC 2013). Light yellow  
541 represents the more agro-intensive areas while light green represents less agro-intensive areas.



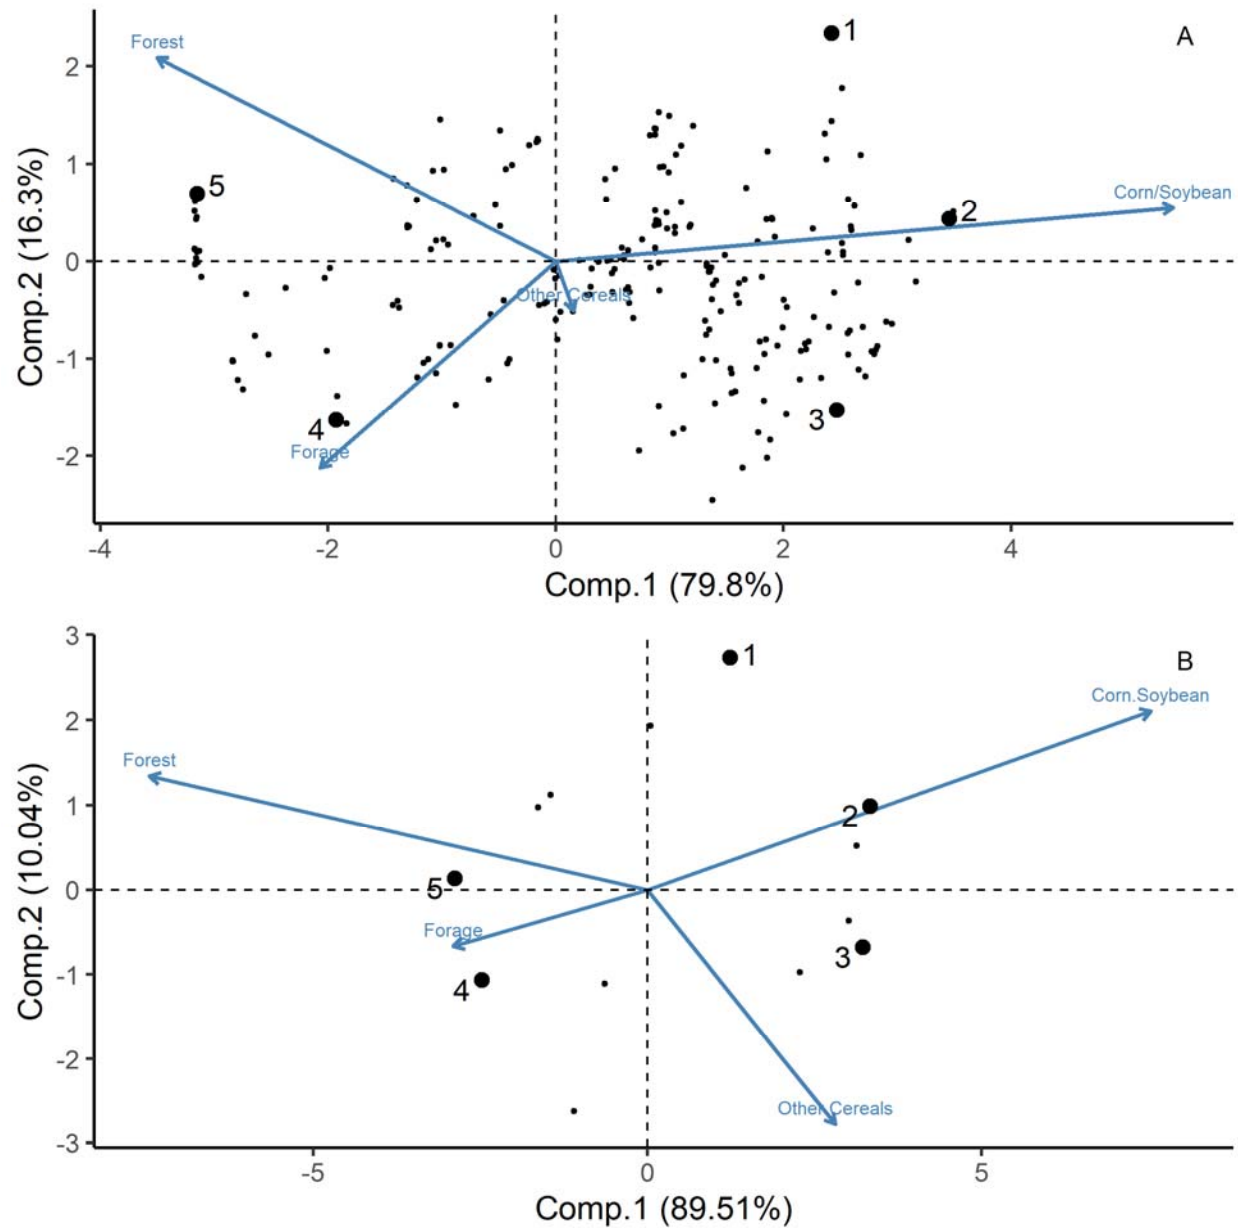

**Figure 3:** Results of the robust PCA for compositional data including the site scores of the five landscape context scenarios for the food provisioning sessions (A) and foraging distance studies (B). Points in the background represent the site scores assigned to each food provisioning session. The arrows lengths are eigenvectors representing the direction and magnitude of correlation between habitats. The five landscape scenarios are: ones dominated by corn or

548 soybean with 8.8% forest cover (Corn/soybean with forest, 1), ones denuded of forest cover and  
 549 dominated by only corn or soybean (Corn/Soybean,2), ones denuded of forest cover and  
 550 dominated by a mixture of corn, soybean and cereals (mixed row crop, 3), ones minimizing  
 551 forest cover (9.0%) and dominated by forage crops (Forage, 4), and agricultural landscapes with  
 552 69.0% forest cover (Agro-forested, 5)

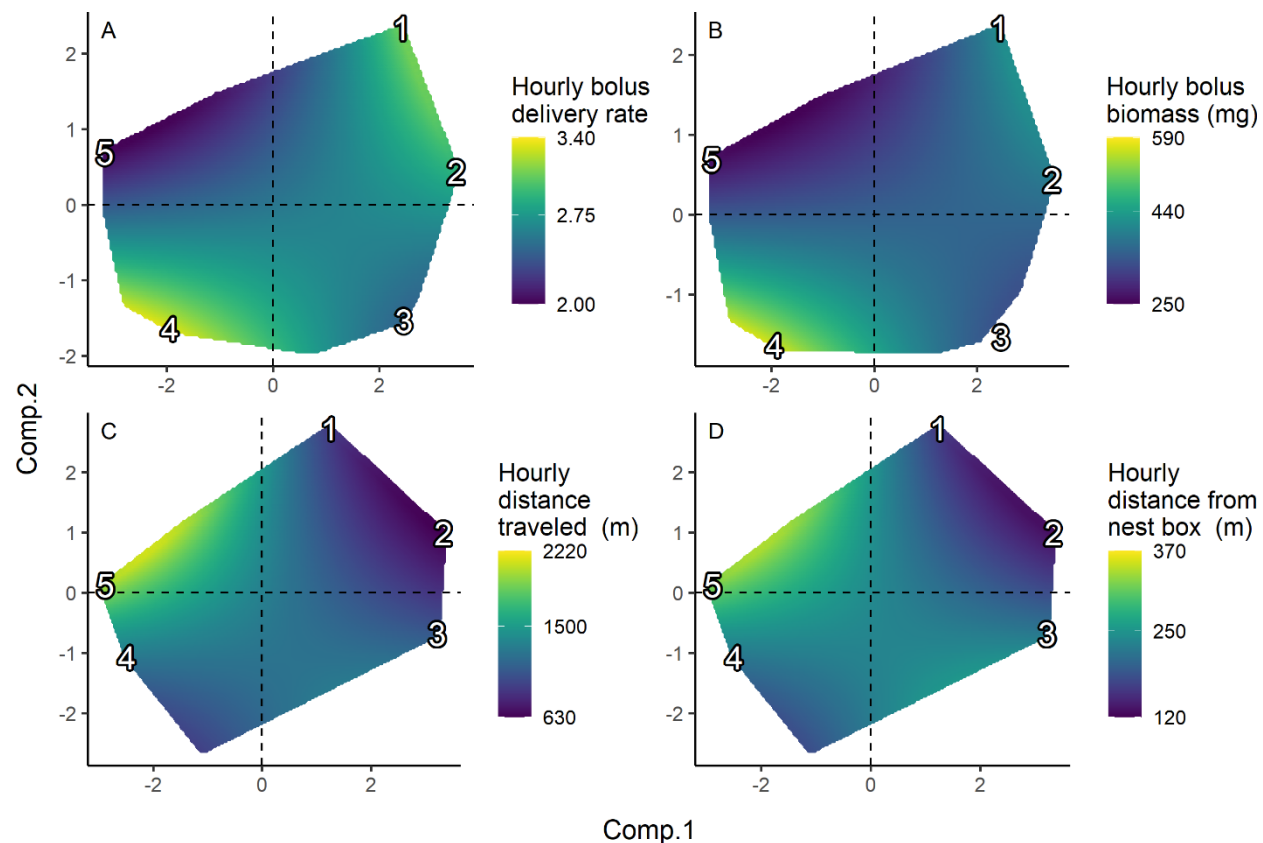

**Figure 4:** Response surfaces of the principal response variables against the first two components deriving the landscape context. Deeper blue represents lower predicted values while yellow represents greater values. Predicted hourly bolus delivery rate (A), hourly bolus biomass (B) delivered to nestlings. Predicted hourly distance traveled (C) and hourly distance from nest box (D). Numbers in each panel are landscape context scenarios and represent the predominant types of landscape contexts experienced across the agricultural gradient and correspond to the points in numbers in Figure 3. Scenarios are: (1) ones dominated by corn or soybean with 8.8% forest cover (corn/soybean with forest); (2) ones denuded of forest cover and dominated by only corn or soybean (corn/soybean); (3) ones denuded of forest cover and dominated by a mixture of corn, soybean and cereals (mixed row crops); (4) ones with 9.0% forest cover and dominated by



564 forage crops (forage); and (5) landscapes with 69.0% forest cover and few cultivated parcels  
565 typically devoted to forage crops (agro-forested).

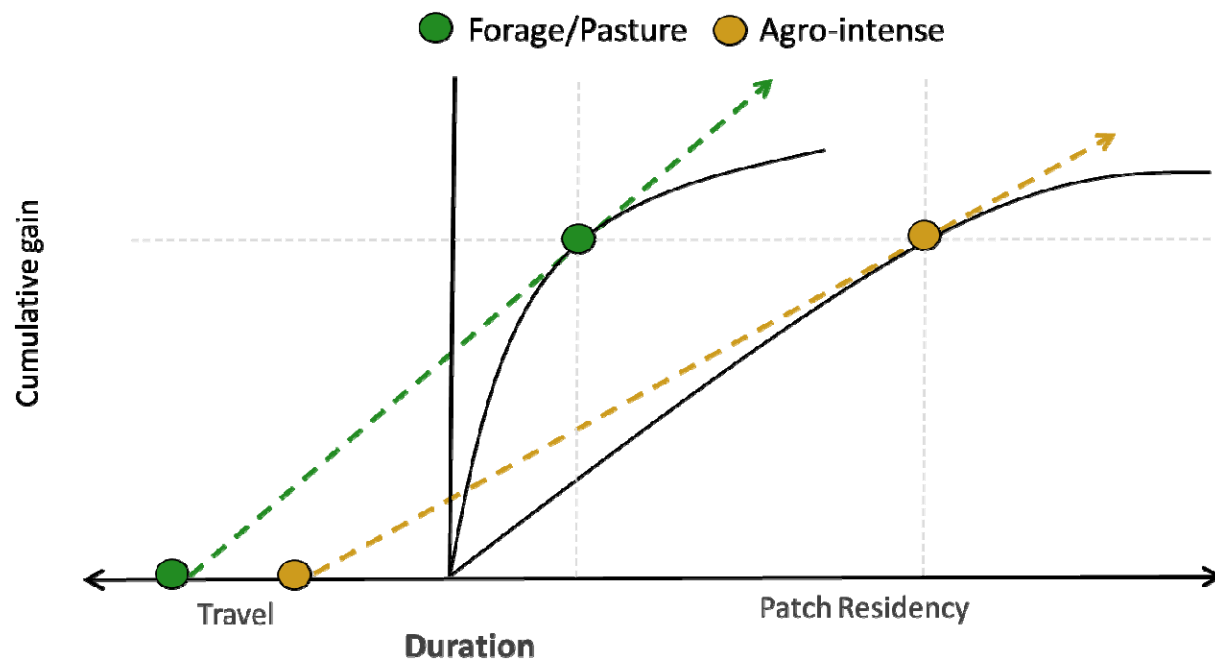

**Figure 5:** Reasoning underlying our hypothesis that food patches within forage landscapes allow for a more rapid accumulation of food resources than those found in more agro-intensive landscapes. Assuming that food provisioning Tree swallow females foraged according to the marginal value theorem, and given we found (1) that the individual bolus biomass was similar across the agricultural intensification gradient, (2) that travel distances were greater in forage than in agro-intense landscapes, then only a lower gain curve in agro-intense landscapes is compatible with our findings that hourly bolus biomass and hourly number of boluses delivered were higher in forage than in agro-intense landscapes. Gain rate is graphically represented by the slope of the dashed line connecting mean travel time to the tangent of the gain curve.

## Bibliography

- Agriculture and Agri-Food Canada (AAFC). 2018. Annual Crop Inventory. <https://open.canada.ca/data/en/dataset/>.
- Bélanger, L., and M. Grenier. 2002. Agriculture intensification and forest fragmentation in the St. Lawrence valley, Québec, Canada. *Landscape Ecology* 17:495–507.
- Belant, J. L., L. A. Tyson, and T. W. Seamans. 2000. Wildlife Management: Cropping to Manage or Managing to Crop? *Wildlife Society Bulletin* 28:774–779.
- Bélisle, M. 2005. Measuring landscape connectivity: the challenge of behavioral landscape ecology. *Ecology* 86:1988–1995.
- Bellavance, V., M. Bélisle, J. Savage, F. Pelletier, and D. Garant. 2018. Influence of agricultural intensification on prey availability and nestling diet in Tree Swallows (*Tachycineta bicolor*). *Canadian Journal of Zoology* 96:1053–1065.
- Benton, T. G., D. M. Bryant, L. Cole, and H. Q. P. Crick. 2002. Linking agricultural practice to insect and bird populations: a historical study over three decades. *Journal of Applied Ecology* 39:673–687.
- Benton, T. G., J. A. Vickery, and J. D. Wilson. 2003. Farmland biodiversity: is habitat heterogeneity the key? *Trends in Ecology & Evolution* 18:182–188.
- Berzins, L. L., R. D. Dawson, C. A. Morrissey, and R. G. Clark. 2020. The relative contribution of individual quality and changing climate as drivers of lifetime reproductive success in a short-lived avian species. *Scientific Reports* 10:19766.
- Bivand, R. S., E. J. Pebesma, and V. Gomez-Rubio. 2013. *Applied spatial data analysis with R*, Second edition. Springer.
- Bivand, R. S., and C. Rundel. 2019. Package ‘rgeos’ - Interface to Geometry Engine - Open Source (‘GEOS’).
- Blasco-Moreno, A., M. Pérez-Casany, P. Puig, M. Morante, and E. Castells. 2019. What does a zero mean? Understanding false, random and structural zeros in ecology. *Methods in Ecology and Evolution* 10:949–959.
- Boetzel, F. A., M. Schuele, J. Krauss, and I. Steffan-Dewenter. 2020. Pest control potential of adjacent agri-environment schemes varies with crop type and is shaped by landscape context and within-field position. *Journal of Applied Ecology* 57:1482–1493.
- Bowler, D. E., H. Heldbjerg, A. D. Fox, M. Jong, and K. Böhning-Gaese. 2019. Long-term declines of European insectivorous bird populations and potential causes. *Conservation*

Biology 33:1120–1130.

- Boynton, C. K., N. A. Mahony, and T. D. Williams. 2020. Barn Swallow (*Hirundo rustica*) fledglings use crop habitat more frequently in relation to its availability than pasture and other habitat types. *The Condor* 122.
- Brooks, M. E., K. Kristensen, K. J. van Benthem, A. Magnusson, C. W. Berg, A. Nielsen, H. J. Skaug, M. Mächler, and B. M. Bolker. 2017. glmmTMB balances speed and flexibility among packages for zero-inflated generalized linear mixed modeling. *R Journal*.
- Bruun, M., and H. G. Smith. 2003. Landscape composition affects habitat use and foraging flight distances in breeding European starlings. *Biological Conservation* 114:179–187.
- Bryant, D. M., and P. Tatner. 2008. Intraspecific variation in avian energy expenditure: correlates and constraints. *Ibis* 133:236–245.
- Burnham, K. P., and D. R. Anderson. 2002. *Model Selection and Multimodel Inference*. second. Springer.
- Canada, N. R. 2020. National Hydro Network - NHN - GeoBase Series. <https://www.nrcan.gc.ca/science-and-data/science-and-research/earth-sciences/geography/topographic-information/geobase-surface-water-program-geeau/national-hydrographic-network/21361>.
- Catry, I., A. M. A. Franco, and F. Moreira. 2014. Easy but ephemeral food: exploring the trade-offs of agricultural practices in the foraging decisions of Lesser Kestrels on farmland. *Bird Study* 61:447–456.
- Charnov, E. L. 1976. Optimal foraging, the marginal value theorem. *Theoretical Population Biology* 9:129–136.
- Courtois, È. 2020. Sélection De Nichoir Chez L’hirondelle Bicolore (*Tachycineta Bicolor*) En Milieux Agricoles□: Une Trappe Écologique?
- Cox, A. R., R. J. Robertson, Á. Z. Lendvai, K. Everitt, and F. Bonier. 2019. Rainy springs linked to poor nestling growth in a declining avian aerial insectivore (*Tachycineta bicolor*). *Proceedings of the Royal Society B: Biological Sciences* 286:20190018.
- Dawson, R. D., and G. R. Bortolotti. 2000. Reproductive Success of American Kestrels: The Role of Prey Abundance and Weather. *The Condor* 102:814–822.
- DiBartolomeis, M., S. Kegley, P. Mineau, R. Radford, and K. Klein. 2019. An assessment of acute insecticide toxicity loading (AITL) of chemical pesticides used on agricultural land in the United States. *PLOS ONE* 14:e0220029.

642 Dreelin, R. A., J. R. Shipley, and D. W. Winkler. 2018. Flight Behavior of Individual Aerial  
643 Insectivores Revealed by Novel Altitudinal Dataloggers. *Frontiers in Ecology and*  
644 *Evolution* 6:1–7.

645 Drent, R. H., and S. Daan. 1980. The Prudent Parent: Energetic Adjustments in Avian Breeding.  
646 *Ardea* 68:225–252.

647 Ducks Unlimited. 2020. Ducks unlimited GIS mapping applications.  
648 <https://www.ducks.ca/initiatives/gis-mapping-applications/>.

649 Dunn, P. O., D. W. Winkler, L. a. Whittingham, S. J. Hannon, and R. J. Robertson. 2011. A test  
650 of the mismatch hypothesis: How is timing of reproduction related to food abundance in an  
651 aerial insectivore? *Ecology* 92:450–461.

652 Elgin, A. S., R. G. Clark, and C. A. Morrissey. 2020. Tree Swallow selection for wetlands in  
653 agricultural landscapes predicted by central-place foraging theory. *The Condor* 122:1–12.

654 Eng, M. L., B. J. M. Stutchbury, and C. A. Morrissey. 2017. Imidacloprid and chlorpyrifos  
655 insecticides impair migratory ability in a seed-eating songbird. *Scientific Reports* 7:15176.

656 Eng, M. L., B. J. M. Stutchbury, and C. A. Morrissey. 2019. A neonicotinoid insecticide reduces  
657 fueling and delays migration in songbirds. *Science* 365:1177–1180.

658 English, P. A., J. J. Nocera, B. A. Pond, and D. J. Green. 2017. Habitat and food supply across  
659 multiple spatial scales influence the distribution and abundance of a nocturnal aerial  
660 insectivore. *Landscape Ecology* 32:343–359.

661 Evans, K. L., R. B. Bradbury, and J. D. Wilson. 2003. Selection of hedgerows by Swallows  
662 *Hirundo rustica* foraging on farmland: the influence of local habitat and weather. *Bird*  
663 *Study* 50:8–14.

664 Evans, K. L., J. D. Wilson, and R. B. Bradbury. 2007. Effects of crop type and aerial invertebrate  
665 abundance on foraging barn swallows *Hirundo rustica*. *Agriculture, Ecosystems &*  
666 *Environment* 122:267–273.

667 Evens, R., N. Beenaerts, T. Neyens, N. Witters, K. Smeets, and T. Artois. 2018. Proximity of  
668 breeding and foraging areas affects foraging effort of a crepuscular, insectivorous bird.  
669 *Scientific Reports* 8:3008.

670 Filzmoser, P., K. Hron, and C. Reimann. 2009. Principal component analysis for compositional  
671 data with outliers. *Environmetrics* 20:621–632.

672 Fischer, J., and D. B. Lindenmayer. 2007. Landscape modification and habitat fragmentation: a  
673 synthesis. *Global Ecology and Biogeography* 16:265–280.

674 Garrett, D. R., F. Pelletier, D. Garant, and M. Bélisle. 2021. Combined influence of food  
675 availability and agricultural intensification on a declining aerial insectivore. *bioRxiv*.

676 Geary, B., P. L. Leberg, K. M. Purcell, S. T. Walter, and J. Karubian. 2020. Breeding Brown  
677 Pelicans Improve Foraging Performance as Energetic Needs Rise. *Scientific Reports*  
678 10:1686.

679 Ghilain, A., and M. Bélisle. 2008. Breeding success of tree swallows along a gradient of  
680 agricultural intensification. *Ecological Applications* 18:1140–1154.

681 Giroux, I. 2019. Présence de pesticides dans l’eau au Québec : Portrait et tendances dans les  
682 zones de maïs et de soya – 2015 à 2017, Québec, ministère de l’Environnement et de la  
683 Lutte contre les changements climatiques, Direction générale du suivi de l’état de l’environ.

684 Grue, C. E., P. L. Gibert, and M. E. Seeley. 1997. Neurophysiological and Behavioral Changes  
685 in Non-Target Wildlife Exposed to Organophosphate and Carbamate Pesticides:  
686 Thermoregulation, Food Consumption, and Reproduction. *American Zoologist* 37:369–388.

687 Gruebler, M. U., M. Morand, and B. Naef-Daenzer. 2008. A predictive model of the density of  
688 airborne insects in agricultural environments. *Agriculture, Ecosystems & Environment*  
689 123:75–80.

690 Hallmann, C. A., R. P. B. Foppen, C. A. M. van Turnhout, H. de Kroon, and E. Jongejans. 2014.  
691 Declines in insectivorous birds are associated with high neonicotinoid concentrations.  
692 *Nature* 511:341–343.

693 Haroune, L., R. Cassoulet, M.-P. Lafontaine, M. Bélisle, D. Garant, F. Pelletier, H. Cabana, and  
694 J.-P. Bellenger. 2015. Liquid chromatography-tandem mass spectrometry determination for  
695 multiclass pesticides from insect samples by microwave-assisted solvent extraction  
696 followed by a salt-out effect and micro-dispersion purification. *Analytica Chimica Acta*  
697 891:160–170.

698 Harrison, X. A., J. D. Blount, R. Inger, D. R. Norris, and S. Bearhop. 2011. Carry-over effects as  
699 drivers of fitness differences in animals. *Journal of Animal Ecology* 80:4–18.

700 Hartig, F. 2020. DHARMA: Residual Diagnostics for Hierarchical (Multi-Level / Mixed)  
701 Regression Models. R package version 0.2.0.

702 Hinsley, S. A. 2000. The costs of multiple patch use by birds. *Landscape Ecology* 15:765–775.

703 Houle, C., F. Pelletier, M. Bélisle, and D. Garant. 2020. Impacts of environmental heterogeneity  
704 on natural selection in a wild bird population. *Evolution* 74:1142–1154.

705 Hussell, D. J. T. 1983. Age and Plumage Color in Female Tree Swallows. *Journal of Field*  
706 *Ornithology* 54:312–318.

707 Imlay, T. L., H. A. R. Mann, and M. L. Leonard. 2017. No effect of insect abundance on nestling  
708 survival or mass for three aerial insectivores. *Avian Conservation and Ecology* 12:art19.

709 Jenni-Eiermann, S., and L. Jenni. 1996. Metabolic Differences Between the Postbreeding,  
710 Moulting and Migratory Periods in Feeding and Fasting Passerine Birds. *Functional*  
711 *Ecology* 10:62.

712 Jobin, B., J.-L. DesGranges, and C. Boutin. 1996. Population trends in selected species of  
713 farmland birds in relation to recent developments in agriculture in the St. Lawrence Valley.  
714 *Agriculture, Ecosystems & Environment* 57:103–116.

715 Johnson, M. E., and M. P. Lombardo. 2000. Nestling Tree Swallow (*Tachycineta bicolor*) Diets  
716 in an Upland Old Field in Western Michigan. *The American Midland Naturalist* 144:216–  
717 219.

718 Jokimäki, J., E. Huhta, J. Itämes, and P. Rahko. 1998. Distribution of arthropods in relation to  
719 forest patch size, edge, and stand characteristics. *Canadian Journal of Forest Research*  
720 28:1068–1072.

721 Jones, G. 1987. Parent-offspring resource allocation in swallows during nestling rearing: an  
722 experimental study. *Ardea* 75:145–168.

723 Jones, G. 1988. Concurrent Demands of Parent and Offspring Swallows *Hirundo rustica* in a  
724 Variable Feeding Environment. *Ornis Scandinavica* 19:145.

725 Lagrange, P. 2015. Déterminants De La Survie Et De La Dispersion De Reproduction Par Une  
726 Approche Capture-Marquage-Recapture Chez L’Hirondelle Bicolore Au Québec.

727 Lamoureux, S. 2010. Impact de l’intensification agricole sur l’effort parental, la croissance et la  
728 survie des oisillons chez l’hirondelle bicolore (*Tachycineta bicolor*). Université de  
729 Sherbrooke.

730 Lessard, A., A. Bourret, M. Bélisle, F. Pelletier, and D. Garant. 2014. Individual and  
731 environmental determinants of reproductive success in male tree swallow (*Tachycineta*  
732 *bicolor*). *Behavioral Ecology and Sociobiology* 68:733–742.

733 Lo, S., and S. Andrews. 2015. To transform or not to transform: using generalized linear mixed  
734 models to analyse reaction time data. *Frontiers in Psychology* 6:1–16.

735 Lopez-Antia, A., M. E. Ortiz-Santaliestra, F. Mougeot, and R. Mateo. 2015. Imidacloprid-treated  
736 seed ingestion has lethal effect on adult partridges and reduces both breeding investment  
737 and offspring immunity. *Environmental Research* 136:97–107.

738 Malaj, E., L. Freistadt, and C. A. Morrissey. 2020. Spatio-Temporal Patterns of Crops and  
739 Agrochemicals in Canada Over 35 Years. *Frontiers in Environmental Science* 8:1–12.



- Mayne, G. J., C. A. Bishop, P. A. Martin, H. J. Boermans, and B. Hunter. 2005. Thyroid Function in Nestling Tree Swallows and Eastern Bluebirds Exposed to Non-Persistent Pesticides and p, p-DDE in Apple Orchards of Southern Ontario, Canada. *Ecotoxicology* 14:381–396.
- Mazerolle, M. J. 2020. AICcmodavg: model selection and multimodel inference based on (Q)AIC(c).
- McCarty, J. P. 2002. The number of visits to the nest by parents is an accurate measure of food delivered to nestlings in Tree Swallows. *Journal of Field Ornithology* 73:9–14.
- McCarty, J. P., and D. W. Winkler. 1999. Foraging Ecology and Diet Selectivity of Tree Swallows Feeding Nestlings. *The Condor* 101:246–254.
- McClenaghan, B., K. C. R. Kerr, and E. Nol. 2019. Does prey availability affect the reproductive performance of Barn Swallows (*Hirundo rustica*) breeding in Ontario, Canada? *Canadian Journal of Zoology* 97:979–987.
- Mengelkoch, J. M., G. J. Niemi, and R. R. Regal. 2004. Diet of the nestling tree swallow. *The Condor* 106:423–429.
- Michel, N. L., A. C. Smith, R. G. Clark, C. A. Morrissey, and K. A. Hobson. 2016. Differences in spatial synchrony and interspecific concordance inform guild-level population trends for aerial insectivorous birds. *Ecography* 39:774–786.
- Mineau, P., C. Palmer, J. Melrose, R. Perroy, S. Careas, D. R. Tobergte, and S. Curtis. 2013. Summary for Policymakers. Pages 1–30 in *Intergovernmental Panel on Climate Change*, editor. *Climate Change 2013 - The Physical Science Basis*. Cambridge University Press.
- Montiel-León, J. M., G. Munoz, S. Vo Duy, D. T. Do, M. Vaudreuil, K. Goeury, F. Guillemette, M. Amyot, and S. Sauvé. 2019. Widespread occurrence and spatial distribution of glyphosate, atrazine, and neonicotinoids pesticides in the St. Lawrence and tributary rivers. *Environmental Pollution* 250:29–39.
- Naef-Daenzer, B., L. F. Keller, B. N. Daenzer, and L. F. Keller. 1999. The foraging performance of great and blue tits (*Parus major* and *P. caeruleus*) in relation to caterpillar development, and its consequences for nestling growth and fledging weight. *Journal of Animal Ecology* 68:708–718.
- Nebel, S., A. Mills, J. D. McCracken, and P. D. Taylor. 2010. Declines of Aerial Insectivores in North America Follow a Geographic Gradient. *Avian Conservation and Ecology* 5:art1.
- Nocera, J. J., J. M. Blais, D. V. Beresford, L. K. Finity, C. Grooms, L. E. Kimpe, K. Kyser, N. Michelutti, M. W. Reudink, and J. P. Smol. 2012. Historical pesticide applications



coincided with an altered diet of aerially foraging insectivorous chimney swifts. Proceedings of the Royal Society B: Biological Sciences 279:3114–3120.

Olsson, O., J. S. Brown, and K. L. Helf. 2008. A guide to central place effects in foraging. Theoretical Population Biology 74:22–33.

Orians, G. H., and E. Pearson. 1979. On the theory of central place foraging. Analysis of Ecological Systems:154–1177.

Pebesma, E. J. 2018. Simple Features for R: Standardized Support for Spatial Vector Data. The R Journal 10:439.

Pérez, J. H., D. R. Ardia, E. K. Chad, and E. D. Clotfelter. 2008. Experimental heating reveals nest temperature affects nestling condition in tree swallows (*Tachycineta bicolor*). Biology Letters 4:468–471.

Pigeon, G., R. Baeta, M. Bélisle, D. Garant, and F. Pelletier. 2013. Effects of agricultural intensification and temperature on immune response to phytohemagglutinin in Tree Swallows (*Tachycineta bicolor*). Canadian Journal of Zoology 91:56–63.

Pisa, L. W., V. Amaral-Rogers, L. P. Belzunces, J. M. Bonmatin, C. A. Downs, D. Goulson, D. P. Kreutzweiser, C. Krupke, M. Liess, M. McField, C. A. Morrissey, D. A. Noome, J. Settele, N. Simon-Delso, J. D. Stark, J. P. Van der Sluijs, H. Van Dyck, and M. Wiemers. 2015. Effects of neonicotinoids and fipronil on non-target invertebrates. Environmental Science and Pollution Research 22:68–102.

Porlier, M., M. Bélisle, and D. Garant. 2009. Non-random distribution of individual genetic diversity along an environmental gradient. Philosophical Transactions of the Royal Society B: Biological Sciences 364:1543–1554.

Poulin, B., G. Lefebvre, and L. Paz. 2010. Red flag for green spray: adverse trophic effects of Bt on breeding birds. Journal of Applied Ecology 47:884–889.

QGIS. 2020. QGIS Geographic Information System. QGIS Association. <http://www.qgis.org>.

R Core Team. 2019. R: A language and environment for statistical computing.

Rahmstorf, S., and D. Coumou. 2011. Increase of extreme events in a warming world. Proceedings of the National Academy of Sciences 108:17905–17909.

Rappole, J. H., and A. R. Tipton. 1991. New harness design for attachment of radio transmitters to small passerines. Journal of field ornithology 62:335–337.

Raven, P. H., and D. L. Wagner. 2021. Agricultural intensification and climate change are rapidly decreasing insect biodiversity. Proceedings of the National Academy of Sciences

118:e2002548117.

- Rendell, W. B., and R. J. Robertson. 1990. Influence of Forest Edge on Nest-Site Selection by Tree Swallows. *Wilson Journal of Ornithology* 102:634–644.
- Reznick, D., L. Nunney, and A. Tessier. 2000. Big houses, big cars, superfleas and the costs of reproduction. *Trends in Ecology & Evolution* 15:421–425.
- Rioux Paquette, S., D. Garant, F. Pelletier, and M. Bélisle. 2013. Seasonal patterns in Tree Swallow prey (Diptera) abundance are affected by agricultural intensification. *Ecological Applications* 23:122–133.
- Rose, A. P. 2009. Temporal and Individual Variation in Offspring Provisioning by Tree Swallows: A New Method of Automated Nest Attendance Monitoring. *PLoS ONE* 4:e4111.
- Rosenberg, K. V., A. M. Dokter, P. J. Blancher, J. R. Sauer, A. C. Smith, P. A. Smith, J. C. Stanton, A. Panjabi, L. Helft, M. Parr, and P. P. Marra. 2019. Decline of the North American avifauna. *Science* 366:120–124.
- Rubolini, D., A. Massi, and F. Spina. 2002. Replacement of body feathers is associated with low pre-migratory energy stores in a long-distance migratory bird, the barn swallow (*Hirundo rustica*). *Journal of Zoology* 258:S0952836902001590.
- Ruiz, J., and G. Domon. 2009. Analysis of landscape pattern change trajectories within areas of intensive agricultural use: case study in a watershed of southern Québec, Canada. *Landscape Ecology* 24:419–432.
- Sæther, B.-E., and O. Bakke. 2000. Avian Life History Variation and Contribution of Demographic Traits to the Population Growth Rate. *Ecology* 81:642.
- Schifferli, L., M. U. Gruebler, H. A. J. Meijer, G. H. Visser, and B. Naef-Daenzer. 2014. Barn Swallow *Hirundo rustica* parents work harder when foraging conditions are good. *Ibis* 156:777–787.
- Shipley, J. R., C. W. Twining, C. C. Taff, M. N. Vitousek, A. Flack, and D. W. Winkler. 2020. Birds advancing lay dates with warming springs face greater risk of chick mortality. *Proceedings of the National Academy of Sciences* 117:25590–25594.
- Sigouin, A. 2020. Effets Combinés De L'exposition Aux Pesticides Et À Des Ectoparasites Hématophages Sur La Physiologie Des Oisillons De L'hirondelle Bicolore. Université de Sherbrooke.
- Smits, J. E. G., G. R. Bortolotti, M. Sebastian, and J. J. H. Ciborowski. 2005. Spatial, temporal, and dietary determinants of organic contaminants in nestling tree swallows in point Pelee national park, Ontario, Canada. *Environmental Toxicology and Chemistry* 24:3159.

- Spiller, K. J., and R. Dettmers. 2019. Evidence for multiple drivers of aerial insectivore declines in North America. *The Condor* 121:1–13.
- Staggenborg, J., H. M. Schaefer, C. Stange, B. Naef-Daenzer, and M. U. Gruebler. 2017. Time and travelling costs during chick-rearing in relation to habitat quality in Little Owls *Athene noctua*. *Ibis* 159:519–531.
- Stanton, R., R. G. Clark, and C. A. Morrissey. 2017. Intensive agriculture and insect prey availability influence oxidative status and return rates of an aerial insectivore. *Ecosphere* 8:e01746.
- Stanton, R., C. A. Morrissey, and R. G. Clark. 2016. Tree Swallow (*Tachycineta bicolor*) foraging responses to agricultural land use and abundance of insect prey. *Canadian Journal of Zoology* 94:637–642.
- Stanton, R., C. A. Morrissey, and R. G. Clark. 2018. Analysis of trends and agricultural drivers of farmland bird declines in North America: A review. *Agriculture, Ecosystems & Environment* 254:244–254.
- Stearns, S. C. 1992. *The evolution of life histories*. Oxford University Press.
- Stephens, D. W., J. S. Brown, and R. C. Ydenberg. 2008. *Foraging: behavior and ecology*. University of Chicago Press.
- Tapper, S., J. J. Nocera, and G. Burness. 2020. Experimental evidence that hyperthermia limits offspring provisioning in a temperate- breeding bird. *Royal Society Open Science* 7.
- Taylor, L. R. 1963. Analysis of the Effect of Temperature on Insects in Flight. *The Journal of Animal Ecology* 32:99.
- Templ, M., K. Hron, and P. Filzmoser. 2011. robCompositions: An R-package for Robust Statistical Analysis of Compositional Data. Pages 341–355 *Compositional Data Analysis*. John Wiley & Sons, Ltd.
- Tews, J., D. G. Bert, and P. Mineau. 2013. Estimated Mortality of Selected Migratory Bird Species from Mowing and Other Mechanical Operations in Canadian Agriculture. *Avian Conservation and Ecology* 8:art8.
- Tremblay, I., D. W. Thomas, J. Blondel, P. Perret, and M. M. Lambrechts. 2004. The effect of habitat quality on foraging patterns, provisioning rate and nestling growth in Corsican Blue Tits *Parus caeruleus*. *Ibis* 147:17–24.
- Tscharntke, T., A. M. Klein, A. Kruess, I. Steffan-Dewenter, and C. Thies. 2005. Landscape perspectives on agricultural intensification and biodiversity - ecosystem service management. *Ecology Letters* 8:857–874.

871 Twining, C. W., J. R. Shipley, and D. W. Winkler. 2018. Aquatic insects rich in omega-3 fatty  
872 acids drive breeding success in a widespread bird. *Ecology Letters* 21:1812–1820.

873 Wagner, D. L., E. M. Grames, M. L. Forister, M. R. Berenbaum, and D. Stopak. 2021. Insect  
874 decline in the Anthropocene: Death by a thousand cuts. *Proceedings of the National*  
875 *Academy of Sciences* 118:e2023989118.

876 Wiersma, P. 2005. Metabolic adjustments to increasing foraging costs of starlings in a closed  
877 economy. *Journal of Experimental Biology* 208:4099–4108.

878 Winkler, D. W., K. K. Hallinger, D. R. Ardia, R. J. Robertson, B. J. M. Stutchbury, and R. R.  
879 Cohen. 2020. Tree Swallow (*Tachycineta bicolor*). Page in A. F. Poole, editor. *Birds of the*  
880 *World*. Cornell Lab of Ornithology.

881 Wood, S. N. 2017. *Generalized additive models: an introduction with R*. CRC press.

882 Wuebbles, D. J., K. Kunkel, M. Wehner, and Z. Zobel. 2014. Severe Weather in United States  
883 Under a Changing Climate. *Eos, Transactions American Geophysical Union* 95:149–150.

884 Yap, K. N., O. R. Kim, K. C. Harris, and T. D. Williams. 2017. Physiological effects of  
885 increased foraging effort in a small passerine. *The Journal of Experimental Biology*  
886 220:4282–4291.

887 Zuur, A. F., E. N. Ieno, N. Walker, A. A. Saveliev, and G. M. Smith. 2009. *Mixed effects models*  
888 *and extensions in ecology with R*. Page Smart Society. Springer New York.

889
